## REVIEW

# Cellular and molecular mechanisms coordinating pancreas development

Aimée Bastidas-Ponce<sup>1,2,3,4,\*</sup>, Katharina Scheibner<sup>1,2,3,4,\*</sup>, Heiko Lickert<sup>1,2,3,4</sup> and Mostafa Bakhti<sup>1,2,3,†</sup>

## ABSTRACT

The pancreas is an endoderm-derived glandular organ that participates in the regulation of systemic glucose metabolism and food digestion through the function of its endocrine and exocrine compartments, respectively. While intensive research has explored the signaling pathways and transcriptional programs that govern pancreas development, much remains to be discovered regarding the cellular processes that orchestrate pancreas morphogenesis. Here, we discuss the developmental mechanisms and principles that are known to underlie pancreas development, from induction and lineage formation to morphogenesis and organogenesis. Elucidating such principles will help to identify novel candidate disease genes and unravel the pathogenesis of pancreas-related diseases, such as diabetes, pancreatitis and cancer.

**KEY WORDS:** Pancreas development, Morphogenesis, Organogenesis, Lineage formation, Exocrine cells, Endocrine cells, Islets of Langerhans,  $\beta$ -cells, Diabetes

## Introduction

The pancreas consists of an exocrine compartment that produces digestive enzymes, and an endocrine compartment that generates pancreatic hormones. The exocrine compartment comprises acinar cells that secrete nutrient-digestive zymogens, and a ductal epithelium that neutralizes these enzymes and transports them into the duodenum. By contrast, endocrine cells mediate the regulatory function of the pancreas in glucose homeostasis by producing several peptide hormones that are secreted into the bloodstream. These cells cluster in the islets of Langerhans and include  $\alpha$ -,  $\beta$ -,  $\delta$ -, PP- and  $\epsilon$ -cells that synthesize glucagon, insulin, somatostatin, pancreatic polypeptide and ghrelin, respectively (reviewed by Pan and Wright, 2011; Shih et al., 2013). Malfunction of these hormone-producing cells can lead to abnormalities such as diabetes mellitus. Therefore, understanding how these endocrine cell types develop might help to unravel the pathogenesis of diabetes and identify molecular targets for therapeutic approaches. Furthermore, given that aberrant function of the exocrine pancreas can cause pancreatitis and pancreatic cancer, understanding the developmental mechanisms generating exocrine tissue might pinpoint molecular targets to treat these lethal diseases (reviewed by Dunne and Hezel, 2015; Murtaugh and Keefe, 2015).

In mice, the pancreas is derived from the foregut endoderm and its development takes place through a series of morphological

processes to generate distinct cell types (reviewed by Wells and Melton, 1999; Zorn and Wells, 2009). The early organogenesis of this organ can be classified into two main stages. In the primary stage (or transition), signals from the notochord, endothelium and mesenchyme induce pancreatic buds through the formation and expansion of multipotent progenitor cells (MPCs) from embryonic day (E) 9.0 to E12.5 (reviewed by Gittes, 2009; Lammert et al., 2003; Larsen and Grapin-Botton, 2017). These cells then undergo massive proliferation to generate a multilayered epithelium in which microlumen structures develop. During the secondary stage, the fusion of microlumina creates a central plexus that further remodels into a continuous ramified epithelial network, segregated into tip and trunk domains (Bankaitis et al., 2015; Kesavan et al., 2009; Villasenor et al., 2010). These morphological events coincide with the formation of three main pancreatic cells (endocrine, exocrine/acinar and ductal cells), highlighting a tight association between morphogenesis and differentiation during pancreas development. Further interactions and interconnections between pancreatic cells and the surrounding mesenchyme, endothelium and neuronal projections (reviewed by Cleaver and Dor, 2012; Thorens, 2014) construct the final anatomy of the adult pancreas.

Over the past few decades, intensive efforts have aimed to pinpoint the molecular mechanisms governing pancreas development and organogenesis. Most studies have focused on the identification of signaling pathways and gene regulatory networks responsible for pancreas formation (reviewed by Arda et al., 2013; McCracken and Wells, 2012). However, much remains to be discovered, particularly with regard to the cellular processes that coordinate the morphogenesis of this complex organ. In this Review, we discuss our current knowledge of the cellular and molecular events orchestrating the specification and morphogenesis of pancreatic cells. Given that most studies of pancreas formation to date have been performed in mice, we focus on studies conducted in rodents, which have proved to be a popular and amenable model due to the ease with which they can be genetically modified. Studies of pancreas development in humans have also been performed; although limited, they have highlighted key similarities and differences between pancreas development in mice and man (summarized in Box 1; reviewed by Jennings et al., 2015).

## Pancreas induction and specification

The first step in pancreas formation involves the specification of dorsal and ventral pancreatic buds from foregut endoderm. These buds are formed by proto-differentiated MPCs that express pancreatic and duodenal homeobox 1 (Pdx1) and pancreas-specific transcription factor 1a (Ptf1a) (Burlison et al., 2008). The subsequent growth and expansion of these cells relies on different signaling cues that are derived from the notochord, endothelium and surrounding mesenchyme.

<sup>1</sup>Institute of Diabetes and Regeneration Research, Helmholtz Zentrum München, D-85764 Neuherberg, Germany. <sup>2</sup>Institute of Stem Cell Research, Helmholtz Zentrum München, D-85764 Neuherberg, Germany. <sup>3</sup>German Center for Diabetes Research (DZD), D-85764 Neuherberg, Germany. <sup>4</sup>Technical University of Munich, Medical Faculty, 81675 Munich, Germany.

\*These authors contributed equally to this work

†Author for correspondence (mostafa.bakhti@helmholtz-muenchen.de)

id H.L., 0000-0002-4597-8825; M.B., 0000-0002-2307-1122

### Box 1. Pancreas development in humans

Because of the limited access to human samples, our understanding of human pancreas development is rudimentary and still mainly derives from analysis of embryonic and fetal tissues. Similar to rodent models, the induction of human pancreas initiates with the evagination of the foregut endoderm, at Carnegie stage (CS) 9, to generate ventral and dorsal buds at CS13 (reviewed by Jennings et al., 2015). Unlike the situation in mice, the human pancreas does not undergo primary transition and NKX2.2 is not expressed in pancreatic progenitors (Jennings et al., 2013; reviewed by Pan and Brissova, 2014). By CS19, specified populations of tip-like and trunk-like domains are distinguishable (Jennings et al., 2013). During the fetal period, endocrine progenitors (NGN3<sup>+</sup> SOX9<sup>-</sup>) peak at 8 weeks post coitus (wpc), decline at ~26-28 wpc and are not detectable by 35 wpc (Capito et al., 2013; Salisbury et al., 2014). Although NGN3 is transiently expressed in endocrine progenitors (Jennings et al., 2013), as occurs in mice, newly differentiated human endocrine cells also express NGN3 (Lyttle et al., 2008). In addition, in rare cases of *NGN3* homozygous mutation, patients develop a mild diabetic phenotype, suggesting the existence of NGN3-independent ways to form endocrine progenitors (Rubio-Cabezas et al., 2014). However, it should be noted that some of the human mutations are likely to be hypomorphic, as it was recently described that *GATA6* haploinsufficiency impairs the differentiation of human pluripotent stem cells into PDX1<sup>+</sup> NKX6.1<sup>+</sup> cells (Shi et al., 2017).

The first fetal  $\beta$ -cells emerge at ~8 wpc, followed by the formation of glucagon-expressing cells at 9 wpc (Hanley et al., 2010; Jennings et al., 2013; Jeon et al., 2009; Lyttle et al., 2008; Riedel et al., 2012). At 10 wpc, endocrine clustering starts, and at 12-13 wpc all endocrine cell types can be found in the developing islets (Jennings et al., 2013; Meier et al., 2010). Notably, the morphology of human islets changes during development: at 14 wpc,  $\beta$ -cells are found in the core and  $\alpha$ -cells at the periphery, as has been reported in mouse and in small human islets, but by 21 wpc both cell types are intermingled within the islets (Jeon et al., 2009). This alteration in islet architecture, which has not been reported in mice, might be required for human endocrine cells to achieve their final mature functional state.

### Transcription factors involved in pancreas induction and multipotent progenitor formation

In mice, one of the first signs of pancreas development is the induction of *Pdx1* expression within the primitive gut tube at E8.5 (Burlison et al., 2008; Guz et al., 1995). Shortly after, at E9.0, pancreatic epithelium buds from the foregut endoderm. Next, *Ptf1a* expression is initiated in the pancreatic endoderm domain at E9.5 (Kawaguchi et al., 2002). The importance of these transcription factors (TFs) is reflected by pancreatic agenesis in mice with homozygous mutation for *Pdx1* or *Ptf1a*. However, initial buds are formed in these animals, indicating that we have still not identified the most upstream regulators of pancreatic bud initiation (Ahlgren et al., 1996; Jonsson et al., 1994; Marty-Santos and Cleaver, 2016; Offield et al., 1996). The absence of *Pdx1* also results in defects in gastro-duodenal development, as *Pdx1* is expressed broadly in the foregut endoderm at early stages of development and is not restricted to pancreatic buds. On the other hand, homozygous *Ptf1a* loss of function leads to ventral pancreatic agenesis and a conversion from pancreatic to duodenal fate, although a dorsal rudiment is formed (Kawaguchi et al., 2002). The expression of *Pdx1* and *Ptf1a* during these early stages of pancreas development is regulated by several TFs (Table 1), such as Sox9, Hnf1 $\beta$  and Foxa1/2 (Gao et al., 2008; Haumaitre et al., 2005; Lynn et al., 2007). However, how these factors activate *Pdx1* and *Ptf1a* expression remains unclear. Presumably, the cooperative functions of these TFs and other downstream mediators of common signaling cascades are required for *Pdx1* and *Ptf1a* expression. Indeed, binding sites for Sox9 and

**Table 1. Key transcription factors involved in the formation of pancreatic lineages**

| Developmental stage/<br>cell lineage          | Transcription factor                                                                                                                                                                                                                                         |
|-----------------------------------------------|--------------------------------------------------------------------------------------------------------------------------------------------------------------------------------------------------------------------------------------------------------------|
| Pancreas induction                            | Pdx1 (Mody4, STF-1), Ptf1a (bHLHa29, PTF1-p48), Sox9                                                                                                                                                                                                         |
| MPCs, E9.5-E11.5                              | Pdx1, Ptf1a, Sox9, Foxa1 (Hnf3 $\alpha$ ), Foxa2 (Hnf3 $\beta$ ), Hnf6 (Onecut1), Nkx6.1, Nkx6.2, Gata4, Gata6, Hnf1 $\beta$ (Tcf2, vHNF1), Mnx1 (Hlx69), Hes1 (bHLHb39, Hry), Prox1, Nr5a2 (Ftf, LRH-1, UF2-H3B), Nkx2.2, Pax6, Tead1 (Tcf13, TEF-1), Glis3 |
| Tip MPCs, E12-13.5/14.5                       | Pdx1, Ptf1a, Sox9, Nkx6.1, Gata4, Hnf1 $\beta$ , Nr5a2, c-Myc                                                                                                                                                                                                |
| Bipotent trunk progenitors                    | Pdx1, Sox9, Hnf6, Nkx6.1, Nkx6.2, Hnf1 $\beta$ , Hes1, Glis3                                                                                                                                                                                                 |
| Acinar cells                                  | Ptf1a, Gata4, c-Myc, Nr5a2, Mist1 (Bhlha15), Rbpj                                                                                                                                                                                                            |
| Centroacinar cells                            | Pdx1, Ptf1a, Sox9, Nkx6.1                                                                                                                                                                                                                                    |
| Mature ductal cells                           | Sox9, Hnf1 $\beta$ , Hnf6, Hes1, Pax6, Glis3, Prox1, Gata6                                                                                                                                                                                                   |
| Endocrine progenitors                         | Ngn3, Pdx1, Neurod1 (NeuroD), Isl1, Pax4, Arx, Pax6, Nkx6.1, Nkx2.2, Rfx3, Rfx6, Insm1, Glis3                                                                                                                                                                |
| $\beta$ -cell differentiation and maturation  | Pdx1, Nkx6.1, Neurod1, Ins1/2, Pax4, Pax6, Nkx2.2, MafA, Mnx1, Glis3, Isl1, Rfx3                                                                                                                                                                             |
| $\alpha$ -cell differentiation and maturation | Arx, Pou3f4 (Brn4, Otf9, Oct-9), Pax6, Rfx6, Foxa2, MafB                                                                                                                                                                                                     |
| $\delta$ -cell differentiation                | Pdx1, Pax4, Hhex, Isl1                                                                                                                                                                                                                                       |
| PP-cell differentiation                       | Arx, Rfx3, Isl1                                                                                                                                                                                                                                              |

For reviews, see Arda et al. (2013), Bramswig and Kaestner (2011), Cano et al. (2014), Dassaye et al. (2016), Gittes (2009), Jensen (2004), Larsen and Grapin-Botton (2017), Pan and Wright (2011) and Rieck et al. (2012).

Hnf1 $\beta$  on putative *Ptf1a* promoter regions have been identified (Haumaitre et al., 2005; Lynn et al., 2007). Sox9 also controls the expression of *Hnf1b*, *Hnf6* (*Onecut1*) and *Foxa2*, indicating a crucial role for this TF in establishing a gene regulatory network required for MPC formation and maintenance (Lynn et al., 2007). Furthermore, together with *Pdx1*, Sox9 regulates lineage progression towards the pancreatic fate (Shih et al., 2015a).

From E9.5 to E12.5, pancreatic cells co-express *Ptf1a* and *Pdx1* (Burlison et al., 2008). These proto-differentiated MPCs generate all types of pancreatic cells and their number defines the final size of the adult pancreas (Stanger et al., 2007). One of the key factors regulating MPC numbers during early pancreas development is Notch signaling. Indeed, mutations in Notch signaling components such as delta-like 1 (*Dll1*), *Rbpj* and *Hes1* reduce MPC expansion or accelerate premature endocrine differentiation and ultimately decrease organ size (Ahnfelt-Ronne et al., 2012; Fujikura et al., 2006; Hart et al., 2003; Jensen et al., 2000). *Pdx1* also plays a crucial role in the expansion and maintenance of MPCs, as mice null for this protein exhibit pancreatic agenesis (Ahlgren et al., 1996; Hale et al., 2005; Offield et al., 1996). MPCs also express other TFs, including *Hnf1b*, *Mnx1* and *Sox9*, that enable them to retain their multipotency (Table 1).

### Signaling pathways regulating early pancreas development

The induction and growth of the early pancreas rely on a number of signaling pathways (Table 2). Many of these signals are derived from the notochord, aortic endothelium and the surrounding mesenchyme. For example, prior to pancreatic budding, the prospective dorsal endoderm is in close proximity to the notochord (Wessells and Cohen, 1967), which releases permissive morphogenic signals, including activin- $\beta$ B and FGF2, to induce

**Table 2. The main signaling pathways coordinating pancreas development**

| Developmental stage               | Inductive factor                                             | Inhibitory factor |
|-----------------------------------|--------------------------------------------------------------|-------------------|
| Dorsal bud induction              | RA, Activin, FGF, VEGF                                       | Shh               |
| Ventral bud induction             |                                                              | FGF, BMP, Notch   |
| MPC maintenance and proliferation | FGF10, Notch, Ihh, Wnt/ $\beta$ -catenin, Hippo              |                   |
| MPC differentiation               | Gdf11                                                        | Notch             |
| Branching morphogenesis           | EGF-ErbB, FGF10, Ephrin B2/3, ECM-integrin signaling         | Hh                |
| Endocrine progenitors             |                                                              | FGF, Notch        |
| Endocrine specification           | TGF $\beta$ , EGF, Wnt/ $\beta$ -catenin, Wnt/PCP, VEGF, S1p | Notch             |

BMP, bone morphogenetic protein; ECM, extracellular matrix; EGF, epidermal growth factor; FGF, fibroblast growth factor; PCP, planar cell polarity; RA, retinoic acid; VEGF, vascular endothelial growth factor. For reviews see Gittes (2009), McCracken and Wells (2012), Pan and Wright (2011) and Serup (2012).

pancreas formation (Kim et al., 2000; Kumar et al., 2003; Martín et al., 2005). These signals mainly repress sonic hedgehog (Shh) signaling in the dorsal pancreatic epithelium to activate pancreatic gene expression and hence allow proper pancreas induction (Hebrok et al., 1998; Xuan and Sussel, 2016). Signaling through activin receptor type A and B also inhibits Shh activity and, in line with this, mutations in activin receptors increase Shh expression and impair pancreas formation (Hebrok et al., 1998; Kim et al., 2000).

Development of the early pancreas also relies on active crosstalk between the pancreatic epithelium and the surrounding mesenchyme (Golosow and Grobstein, 1962). The mesenchyme produces factors such as FGF10, BMPs and follistatin that induce pancreas development (Bhushan et al., 2001; Miralles et al., 1998; Norgaard et al., 2003). Signaling via FGF10 and its receptor, FGFR2b, induces pancreatic progenitor proliferation and growth of the pancreatic buds by maintaining and enhancing *Pdx1* and *Ptf1a* expression (Bhushan et al., 2001). In addition, during bud formation Sox9, FGFR2 and FGF10 establish a feed-forward loop in which FGF10 maintains epithelial *Sox9* expression and Sox9 regulates the expression of *Fgf2* to allow FGF10 signaling; disruption of this loop results in loss of cell identity and a switch towards a liver cell fate (Seymour et al., 2012).

Another prominent and well-studied extrinsic signaling pathway regulating MPC maintenance is the Notch/Delta signaling pathway (Hald et al., 2003; Murtaugh et al., 2003). The expression of Notch ligands, such as *Dll1*, starts at E9.0 and continues throughout the primary transition in the pancreatic epithelium (Apelqvist et al., 1999), inducing *Hes1* expression in pancreatic buds to maintain and increase the progenitor pool. This is achieved not only by increasing the proliferation of MPCs but also by preserving the progenitor state and preventing differentiation towards an endocrine cell fate (Ahnfelt-Ronne et al., 2012; Lee et al., 2001). This function of Notch is important in assuring an appropriate number of pancreatic cells; *Hes1* deletion in the early stages of pancreas development results in the differentiation of progenitors into endocrine cells and induces pancreatic hypoplasia (Horn et al., 2012; Jensen et al., 2000).

#### Specification of the dorsal and ventral pancreas

The pancreas develops from two primordia – the dorsal and ventral pancreatic buds – that later fuse to form the adult pancreas. These structures are complex, stratified epithelia, consisting of non-polarized MPCs. The dorsal bud forms at E9.0 from the dorsal foregut endoderm, whereas the ventral bud appears ~12 h later

(Fig. 1A,B) from the caudal aspect of the hepatic/biliary evagination (Villasenor et al., 2010; reviewed by Gittes, 2009). Because of their distinct surrounding tissues, different signals induce dorsal and ventral pancreatic buds. For instance, signals secreted from the lateral plate mesoderm [e.g. retinoic acid (RA)] and notochord (e.g. FGF2 and activin) are required for dorsal bud induction. By contrast, FGF signaling from the cardiac mesoderm inhibits ventral pancreatic bud specification (Deutsch et al., 2001; Hebrok et al., 1998; Kim et al., 2000; Kumar et al., 2003; Martín et al., 2005). The subsequent development and morphogenesis of these buds also differ. Around E8.5-9.0, the dorsal gut tube is separated from the notochord (due to fusion of the paired dorsal aortae in the midline), placing the dorsal pancreatic endoderm in immediate proximity to the aorta. The endothelium of the aorta provides inductive signals to the dorsal endoderm, inducing the formation of a pancreatic bud expressing *Pdx1* and *Ptf1a* (Lammert et al., 2001). By contrast, the ventral pancreatic endoderm is in close contact with the prospective hepatic bud, lateral plate mesoderm, the septum transversum mesenchyme and cardiac mesoderm (Kumar et al., 2003; reviewed by Kumar and Melton, 2003). In fact, the ventral pancreas, liver and extrahepatic biliary system all develop from the posterior segment of the ventral foregut endoderm and therefore might be derived from a common progenitor cell (Deutsch et al., 2001; Spence et al., 2009). The signaling pathways inducing ventral pancreas formation are unclear. BMP and FGF have been shown to segregate the hepatic and pancreatic lineages by inducing liver formation at the expense of a ventral pancreatic fate (Chung et al., 2008; Deutsch et al., 2001; Spence et al., 2009; Tremblay and Zaret, 2005). Furthermore, unlike the dorsal pancreas, the development of the ventral pancreas is not dependent on cues from the endothelium (Yoshitomi, 2004). However, the function of *Pdx1* and *Ptf1a* together with *Hnf1 $\beta$*  is essential for the formation of the ventral pancreas (Haumaitre et al., 2005; Kawaguchi et al., 2002; Offield et al., 1996).

The dorsal pancreatic bud eventually gives rise to the head, neck, body and tail regions of the adult pancreas, whereas the ventral bud generates the posterior part of the head region (Uchida et al., 1999). Importantly, these regions appear to display structural, and hence potentially functional, differences. For example, a higher islet density is found in the tail part compared with the body and head area (Wittingen and Frey, 1974). Furthermore, endocrine composition, vascularization, innervation and the expression of several xenobiotic-metabolizing enzymes differ between islets in the head and tail domains (Brissova et al., 2005; Standop et al., 2002; Stefan et al., 1982). A more recent study has also shown higher percentages of mature  $\beta$ -cells in the tail compared with the head part (Bader et al., 2016). Although the importance of these variations is currently unclear, they might result from the contribution of different pancreatic bud progenitors. Given that type 2 diabetes patients exhibit preferential loss of larger islets located in the head region, and that distinct types of pancreatic ductal adenocarcinoma can arise from head versus tail regions (Ling et al., 2013; Wang et al., 2013), understanding these developmental differences might be important for unravelling the pathogenesis of diabetes and cancer.

#### Early pancreas morphogenesis

After the pancreatic buds have formed, their morphogenesis generates a highly branched, tubular epithelial tree-like network. This highly coordinated process involves epithelial stratification, cell polarization, microlumen formation and fusion, eventually giving rise to a luminal plexus. Later, the plexus is remodeled into a complex tubular network.

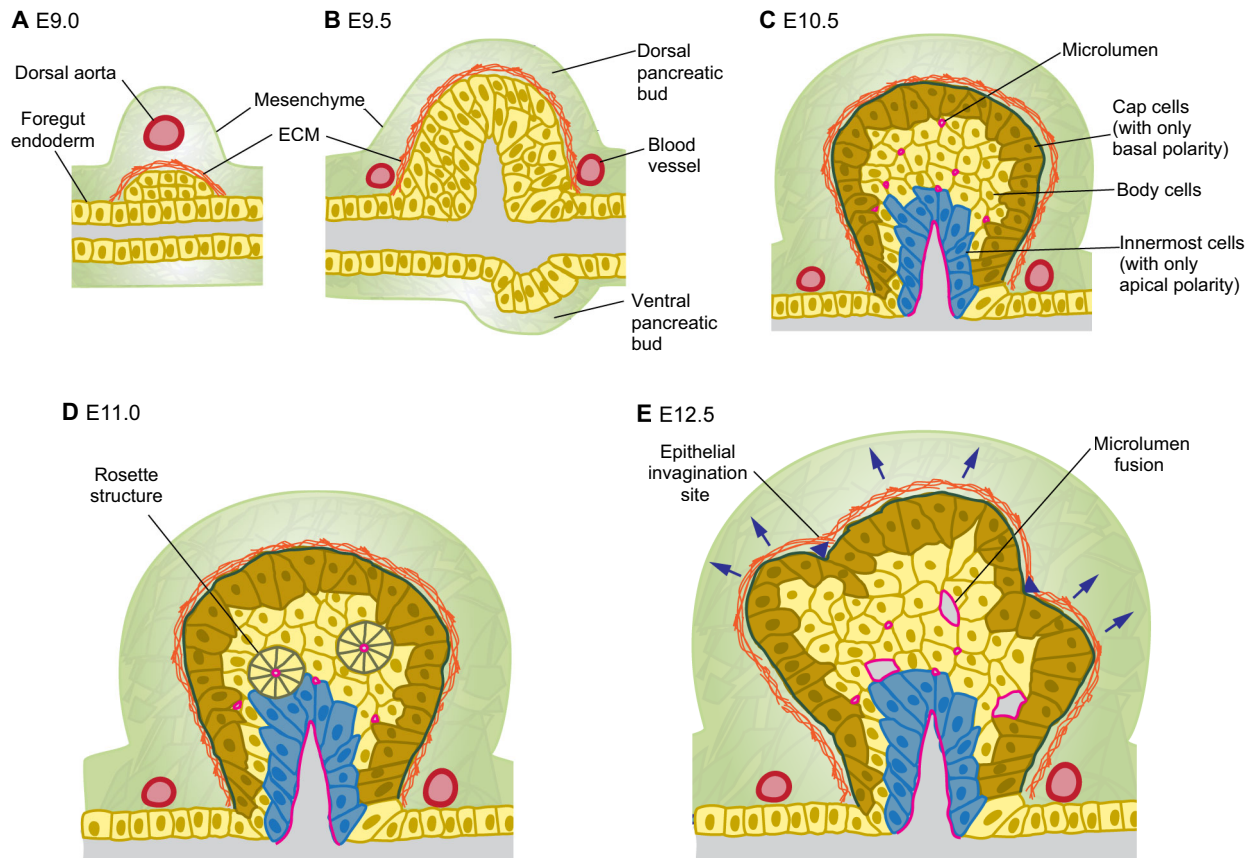

**Fig. 1. The early stages of pancreas development.** (A) Evagination of the foregut endoderm drives the formation of the dorsal pancreatic bud. (B) While the dorsal pancreatic bud expands due to multipotent progenitor cell (MPC) proliferation, the ventral pancreatic bud emerges from the ventral foregut endoderm. (C) Segregation of the pancreatic buds gives rise to innermost cells that exhibit only apical polarity, inner ‘body’ cells that are non-polarized, and outer ‘cap’ cells that exhibit only basal polarity. For simplicity, only the dorsal bud is shown. (D) The establishment of cell polarity in individual body cells produces microlumen and rosette structures. (E) Microlumen fusion and tubulogenesis coincide with the initiation of branching morphogenesis, which involves epithelial invagination (blue arrowhead) and outgrowth (blue arrows).

### Epithelial stratification

Prior to pancreatic branching, dorsal and ventral pancreatic MPCs form a multilayered epithelium (E9.0 to E11.5). This stratified epithelium consists of two domains: an outer layer of ‘cap’ cells and an inner ‘body’ of cells (Shih et al., 2015b; Villasenor et al., 2010). The highly pleomorphic and motile cap cells are semi-polarized and express only basal markers, whereas the inner body cells are mainly non-polarized stratified cells but with a layer of innermost cells that exhibit only apical polarity (Shih et al., 2015b; Villasenor et al., 2010) (Fig. 1C). The segregation of these domains is regulated by cues from the basement membrane through the remodeling of actomyosin contractility. Indeed, disruption of extracellular matrix (ECM)-integrin signaling retains cap cells in a ‘body cell state’ by stabilizing E-cadherin-mediated cell adhesion (Shih et al., 2015b). However, because frequent cell movement between cap and body cells is observed, it is not clear whether each domain later differentiates into a distinct pancreatic lineage. In addition, the stratification process is accompanied by expansion of the MPC pool, suggesting that transient stratification of the epithelium might be crucial for establishing a progenitor pool that assures adequate numbers of mature pancreatic cells (Stanger et al., 2007; Villasenor et al., 2010).

### Polarity establishment and microlumen formation

Individual cells within the inner body of pancreatic buds soon reacquire polarity and rearrange to form microlumina at ~E10.5-

11.5. During this process (Fig. 1D,E), the asynchronous apical constriction of individual polarized cells generates rosette structures with a central lumen that later coalesce to form tubules (Kesavan et al., 2009; Villasenor et al., 2010). Whether lumen formation in the pancreas follows the same principles as in other epithelial organs is unknown, although several common regulators have been identified. For example, an elegant study uncovered a role for the Rho GTPase cell division cycle 42 (*Cdc42*) as an integral player in establishing polarity during microlumen formation in pancreatic buds (Kesavan et al., 2009). Similarly, it has been shown that in the absence of the Rho GTPase-activating protein (GAP) *Stard13*, pancreatic epithelial cells fail to form microlumina due to impaired cytoskeleton organization and downregulated extracellular signal-regulated kinase (ERK) signaling (Petzold et al., 2013). By contrast, deletion of *Rac1* does not impact lumen formation in the pancreas (Heid et al., 2011), indicating specific roles for distinct Rho GTPases during this process. Factors that lie downstream of Pdx1 also regulate lumen formation and pancreas morphogenesis; besides blocking lineage differentiation, the deletion of this TF impairs the expansion and fusion of microlumina to form a large lumen, as well as tubulogenesis, possibly through alterations in E-cadherin-mediated cell adhesion and myosin activity (Marty-Santos and Cleaver, 2016). In addition, impaired endocrine lineage formation is observed upon defective tubulogenesis in a *Cdc42* conditional knockout pancreas (Kesavan et al., 2009), further highlighting the intimate link between pancreatic morphogenesis and differentiation.

### Plexus remodeling and branching morphogenesis

After microlumina are formed, they expand and fuse to generate continuous luminal networks, eventually forming an epithelial plexus that is remodeled into a highly branched, ramified ductal epithelium, producing all types of mature pancreatic cells (Kesavan et al., 2009; Villasenor et al., 2010). During this process, the pancreatic epithelium consists of a core region in which plexus expansion (E12.5-15.5) and plexus-to-duct transformation (E16.5-18.5) occur, and a peripheral region in which the epithelium is remodeled into branches (Fig. 2). The plexus serves as a niche, maintaining and harboring endocrine progenitors during epithelial growth and morphogenesis. Pancreatic progenitor expansion seems to be driven by a local feedback circuit in which cells expressing neurogenin 3 (Ngn3, or Neurog3) suppress endocrine progenitor differentiation in a Notch-dependent manner and thus increase the progenitor pool (Magenheim et al., 2011a). Remarkably, endocrine progenitor differentiation and expansion decline during the plexus-to-duct transformation (Bankaitis et al., 2015).

How branching morphogenesis is coordinated during pancreas development is not fully understood. In salivary glands, the branching process occurs via the formation of shallow clefts (reviewed by Harunaga et al., 2011), but it appears that newly formed branches in the pancreas arise mainly on the lateral sides of the growing epithelium (Puri and Hebrok, 2007; Shih et al., 2015b), although it should be noted that the short length of branches in the pancreas makes it difficult to discern lateral branches from clefts. In this context, branching ensues through the appearance of small invaginations in the epithelium followed by collective expansion and outgrowth of the domain between two invagination spots (Fig. 1E). By contrast, a separate study has proposed that epithelial branches are produced by longitudinal growth of remodeled epithelium, whereby 'tip' domains divide to generate new 'tips' (Villasenor et al., 2010). Based on this model, expansion of MPCs located at the 'tip' structures leads to growth of the epithelium by longitudinal extension. Further quantitative live-cell imaging studies, in particular over a longer time period, are thus needed to better understand the mechanisms underlying pancreas branching.

The molecular factors that regulate pancreatic branching are also unclear. A key cellular process involved in epithelial rearrangement is the remodeling of cell-cell adhesion, and this is partially regulated by EphB signaling during pancreatic microlumen formation and ductal morphogenesis (Villasenor et al., 2010). The deletion of *Stard13* or *p120-catenin* (*Cmnd1*) also causes aberrant tubulogenesis and branching due to the stabilization of epithelial adherens junctions (Hendley et al., 2015), highlighting key roles for these factors in the developing pancreas. TFs such as Hnf1 $\beta$  and Nr5a2 also coordinate branching morphogenesis of the pancreatic epithelium through expansion of the MPC pool (De Vas et al., 2015; Hale et al., 2014). In addition, the mesenchyme and its secreted factors, such as FGF10, promote progenitor proliferation and thereby influence branching morphogenesis (Bhushan et al., 2001). The proliferative effect of FGF10 in this context is mediated by Notch signaling, which acts to reduce the expression of a key cyclin-dependent kinase inhibitor, P57 (Cdkn1c) (Georgia et al., 2006). Therefore, early FGF10-induced MPC proliferation might positively impact the branching process, although it should be noted that this factor is expressed in a restricted area in the mesenchyme at E11.5, when the branching starts, and is no longer expressed thereafter (Bhushan et al., 2001).

### Tip and trunk patterning

From E11.5 onwards, the mouse pancreatic epithelium consists of MPCs that progressively segregate into tip or trunk domains and are allocated to acinar or bipotent endocrine/duct progenitor cell fates, respectively (Fig. 2A). Whereas cells in the tip domain express *Ptf1a* and *Nr5a2*, trunk cells express *Sox9*, *Nkx6.1*, *Hnf1b* and *Pdx1* (Solar et al., 2009; Zhou et al., 2007) (Table 1). The tip and trunk domains are enclosed by a basement membrane consisting mainly of laminin-1, collagen IV and fibronectin that separates the epithelium from the surrounding mesenchyme (Hisaoka et al., 1993). The reciprocally suppressive functions of Nkx6.1 and Ptf1a control how progenitor cells are committed and segregated into tip or trunk domains: the expression of Nkx6.1 induces trunk formation by repressing tip fate, while the activity of Ptf1a favors tip domain generation by blocking the trunk program (Schaffer et al., 2010).

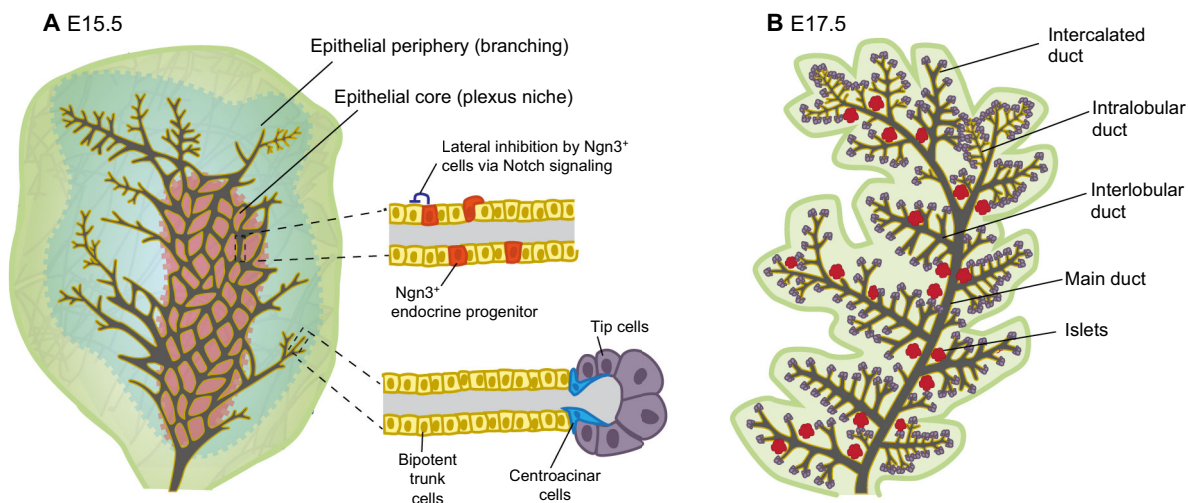

**Fig. 2. Branching morphogenesis during pancreas development.** (A) At E15.5, the pancreatic epithelium consists of a central plexus (red) that serves as a niche, maintaining and harboring endocrine progenitors. Within this niche, *Ngn3*-expressing progenitors prohibit the differentiation of neighboring cells through lateral inhibition in a Notch-dependent manner and thereby allow epithelial expansion. The central plexus is surrounded by an epithelial periphery (blue) in which the epithelium remodels into epithelial branches, which contain bipotent trunk cells, centroacinar cells and tip cells. (B) Remodeling of the plexus gives rise (by ~E17.5) to the formation of the main duct, which branches into interlobular ducts that are connected to acini via intralobular and intercalated ducts. At this stage, the remodeled plexus also contains developing islets.

Signaling pathways, such as the Notch pathway, also regulate tip-trunk patterning. For instance, Notch activity in progenitors induces trunk formation via the activation of *Nkx6.1* and blocks tip fate through the repression of *Ptf1a* (Afelik et al., 2012; Esni, 2004). The function of the E3 ubiquitin ligase mind bomb 1 (Mib1) in activating Notch ligand is also essential for tip-trunk patterning. The endoderm-specific deletion of this protein results in loss of bipotent ductal progenitors concomitant with an increase in *Ptf1a*<sup>+</sup> tip cells, highlighting a crucial role for Notch signaling in trunk cell formation (Horn et al., 2012). In addition, the mesenchyme and endothelium have opposite effects on tip-trunk patterning. Whereas mesenchymal factors and ECM components increase acinar/tip formation, the interconnection between epithelium and endothelial cells favors trunk development (Magenheim et al., 2011a; reviewed by Cleveland et al., 2012). Furthermore, by promoting expression of high levels of the angiogenesis factor *Vegfa*, the trunk domain increases the density of adjacent blood vessels, which in turn prevents differentiation into tip cells (Magenheim et al., 2011b; Pierreux et al., 2010), although the endothelium-derived signals that coordinate this process remain unidentified. Together, these findings illustrate that neighboring cell interactions as well as cell-cell and cell-matrix interactions contribute to patterning and differentiation of the pancreatic epithelium.

**The formation of exocrine pancreatic cell types**

The exocrine compartment of the pancreas, which makes up more than 95% of the organ, comprises acinar and ductal cells. Its development commences during epithelial remodeling and branching morphogenesis, at ~E11.5-12.5 (reviewed by Marty-Santos and Cleaver, 2015). The presence of the mesenchyme is essential for exocrine differentiation due to its production and secretion of

pro-exocrine factors such as the TGFβ antagonist follistatin, which induces exocrine differentiation but represses endocrine cell formation (Miralles et al., 1998). Canonical Wnt signaling also regulates exocrine cell number, as indicated by the impaired exocrine expansion observed when Wnt pathway components are conditionally knocked out (Baumgartner et al., 2014; Wells et al., 2007). Finally, ECM components such as laminin-1 exhibit pro-exocrine (ducts and acini) activity through α6-containing integrin receptor in 3D embryonic pancreatic explant cultures (Crisera et al., 2000).

**Acinar differentiation**

Adult acini consist of pyramid-shaped exocrine cells (Fig. 3) that express *Ptf1a*, *Gata4*, *Mist1* (*Bhlha15*) and *Nr5a2* (Table 1). These cells contain an abundance of rough endoplasmic reticulum and secretory granules carrying digestive enzymes, such as amylase, lipases, ribonucleases and phospholipases (reviewed by Cleveland et al., 2012), which are essential for nutrient digestion. The specification, differentiation and maintenance of acini is regulated mainly by *Ptf1a*; mice lacking this TF have no acinar cells (Krapp et al., 1998). Acting via a PTF1 complex, which contains Tcf3 (E47), Tcf12 (HEB), *Ptf1a* and *Rbpj* or *Rbpjl*, *Ptf1a* indirectly represses the expression of *Nkx6.1* to block trunk fate (Schaffer et al., 2010). After differentiation, acinar cells express *Rbpjl* and *Mist1* to gain their mature phenotype. A switch from *Rbpj* to *Rbpjl* within the PTF1 complex is then essential for the final step of acinar cell maturation (Masui et al., 2010). The activity of this complex in driving acinar gene expression is also enhanced by *Nr5a2*, which independently induces the expression of acinar-specific genes including *Ptf1a*, *Rbpjl* and those encoding digestive enzymes (Hale et al., 2014). Another regulator of acinar cell differentiation and maturation is *Mist1* (Direnzo et al., 2012). This protein is not only important to allow acinar cells to exit the cell cycle,

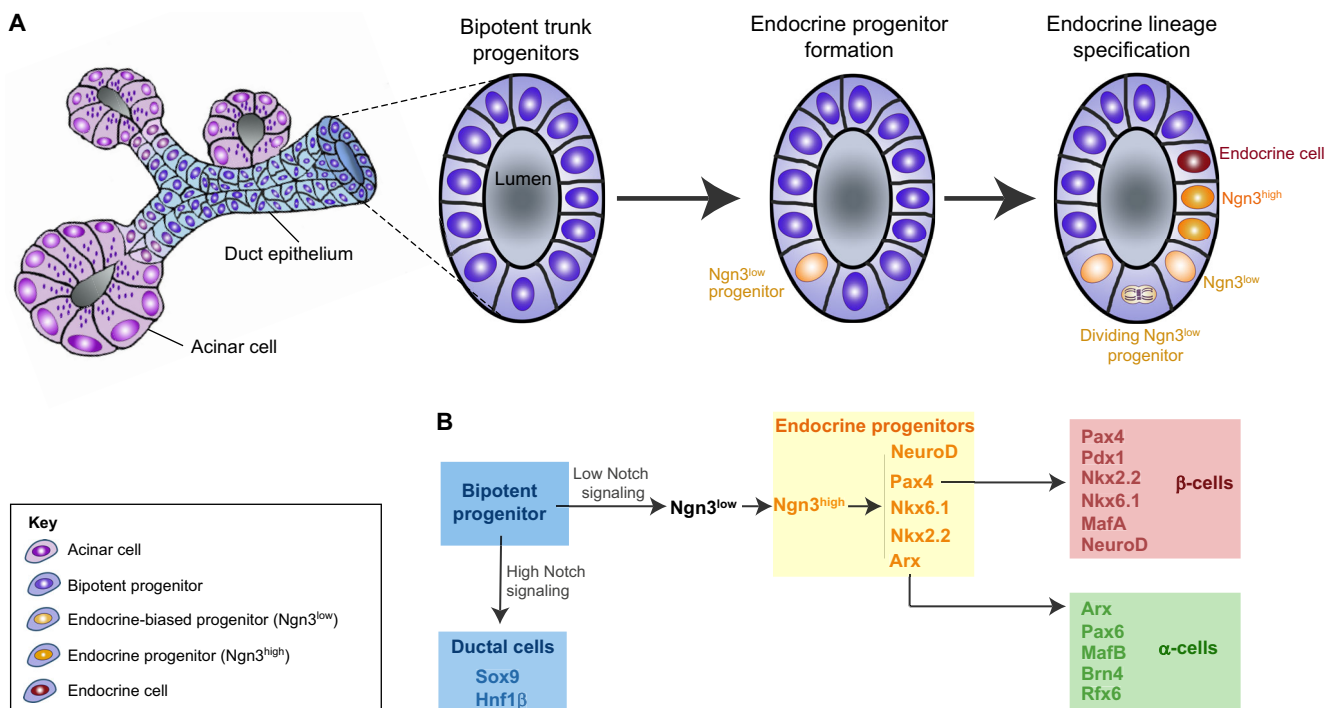

**Fig. 3. Endocrine lineage formation during pancreas development.** (A) Endocrine-biased progenitors (Ngn3<sup>low</sup>) emerge from bipotent progenitors within the trunk epithelium between E12.5 and E16.5. These Ngn3<sup>low</sup> cells give rise to post-mitotic endocrine progenitors expressing high levels of Ngn3 (Ngn3<sup>high</sup>) that are committed to all endocrine cell types. (B) High or low levels of Notch signaling promote the specification of epithelial cells towards bipotent ductal cells or endocrine progenitors, respectively. The expression of different transcription factors, under the control of Ngn3, then defines the differentiation of distinct endocrine cell types.

but is also essential for allowing them to acquire terminal differentiation and secretory function (Jia et al., 2008).

The specification of acinar cells is regulated by different signals such as Notch signaling, which competes with Ptf1a for access to Rbpj and hence blocks the expression of acinar-specific genes (Beres et al., 2006). By contrast,  $\beta$ -catenin inactivation in pancreatic progenitors diminishes acinar formation through reduction of *Ptf1a* expression (Murtaugh et al., 2005; Wells et al., 2007), suggesting that canonical Wnt/ $\beta$ -catenin signaling induces acinar cell development. Furthermore, mesenchyme and its secreted factors such as follistatin display pro-acinar activity, as the culture of embryonic pancreatic explants in the presence of mesenchyme promotes acinar cell differentiation at the expense of endocrine cells (Duvill   et al., 2006; Gittes et al., 1996; Miralles et al., 1998).

### Centroacinar cell formation

Pancreatic acini are connected to ducts through centroacinar cells (CACs)/terminal duct cells (Fig. 2A) (reviewed by Beer et al., 2016) that are derived from multipotent progenitors expressing *Pdx1*, *Sox9*, *Ptf1a* and *Nkx6.1* (Kopp et al., 2011a; Schaffer et al., 2010; Solar et al., 2009). CACs exhibit high levels of aldehyde dehydrogenase 1 (ALDH1) activity and contain a low cytoplasm-to-nucleus ratio (Rovira et al., 2010). In the adult pancreas, CACs have been suggested to function as progenitor-like cells, with sustained Notch signaling being required for maintenance of their identity. Indeed, perturbing Notch activity in CACs rapidly transforms them into acinar cells (Kopinke et al., 2012). In zebrafish, CACs are enriched for progenitor markers and can generate endocrine cells upon partial pancreatectomy or  $\beta$ -cell ablation, which is likely to be due to the high regenerative capacity of this model organism (Delaspre et al., 2015). Whether such regenerative potential of CACs exists in mammals, and whether these cells can give rise to endocrine cells, remains controversial. While lineage-tracing experiments have failed to show the differentiation of endocrine cells from CACs in adult mice (Kopinke et al., 2011; Solar et al., 2009), *in vitro* studies have revealed a progenitor-like state of these cells (Rovira et al., 2010), suggesting potential differentiation towards both endocrine and exocrine fates in the adult pancreas.

### Formation of the ductal epithelium and bipotent cells

The trunk domain of the embryonic pancreas consists of bipotent epithelial cells that express *Pdx1*, *Nkx6.1*, *Sox9* and *Hnf1b*. During development, these cells are able to differentiate into either *Sox9*/*Hnf1b*-expressing ductal exocrine cells or *Ngn3*/*Pdx1*-positive endocrine cells (Fig. 3). One of the important players in the trunk domain is *Sox9*, which induces the activity of *Ngn3* and *Hes1* (reviewed by Seymour, 2014). Whereas *Ngn3* blocks *Sox9* expression, *Hes1* inhibits *Ngn3*, highlighting the tight regulation of cell fate decisions within the trunk epithelium (Lee et al., 2001; Shih et al., 2012). The main determinant favoring a ductal fate is Notch signaling, which promotes ductal cell development and inhibits acinar and endocrine cell differentiation (Hald et al., 2003; Murtaugh and Melton, 2003). Therefore, to maintain ductal cell identity, trunk cells require continuous Notch signaling. It has been suggested that upon commitment, *Ngn3*-expressing cells produce Notch ligands to activate the pathway in adjacent cells and prevent further endocrine differentiation (Qu et al., 2013; reviewed by Afelik and Jensen, 2013). This so-called 'lateral inhibition' is required to maintain the balance between endocrine and epithelial cells.

### Mature ductal epithelium formation

The main duct of the adult pancreas is connected to the bile duct and duodenum (Fig. 2B). The main duct branches into the pancreatic

lobes via the interlobular ducts that are connected to acinar cells through intralobular and intercalated ducts (reviewed by Reichert and Rustgi, 2011) (Fig. 2B). The cells within these various ducts express specific markers, including carbonic anhydrase II, mucin 1 and CD133 (PROM1). Besides transporting pancreatic zymogens, ductal cells also secrete bicarbonate for neutralizing gastric acid in the duodenal lumen (reviewed by Reichert and Rustgi, 2011). In comparison to embryonic stages, *Pdx1* and *Nkx6.1* are not expressed in mature ductal cells, although these cells still express *Sox9*, *Hes1*, *Hnf1b*, *Hnf6*, *Glis3* and *Prox1*. Of these, *Hnf6* is required for maturation of the ductal epithelium (Pierreux et al., 2006). Whether other TFs also regulate ductal cell maturation remains to be shown. Furthermore, while endocrine cells can emerge from progenitors located within the ductal epithelium during development (see below), whether the mature duct is still able to produce endocrine cells remains a matter of debate (see Box 2).

### The formation of pancreatic endocrine cells

During the secondary transition stage, between E12.5 and E15.5, endocrine progenitors are derived from the bipotent trunk epithelium (Solar et al., 2009). These progenitors transiently express *Ngn3* and give rise to all endocrine cell types (Gradwohl et al., 2000; Gu et al., 2002). As we discuss below, coordination between extrinsic signals and intrinsic gene regulatory networks orchestrates the formation of mature hormone-producing cells.

### Endocrine progenitor cell formation

The master regulator of endocrine cell formation is *Ngn3* (Gu et al., 2002). This protein is transiently expressed in *Sox9*<sup>+</sup> bipotent progenitors and induces several endocrine-specific genes, such as *NeuroD* (*Neurod1*), *Insm1*, *Irx1/2*, *Rfx6*, *Pax4* and *Nkx2.2* (Petri et al., 2006). The first *Ngn3*<sup>+</sup> cells appear at ~E9.0, with their numbers rising during the secondary transition stage and then declining at E17.5 (Villasenor et al., 2008). Mice lacking *Ngn3* have no endocrine cells in the pancreas and die shortly after birth (Gradwohl et al., 2000). By contrast, the ectopic expression of *Ngn3*, or its downstream target *NeuroD* under the control of the *Pdx1* promoter, results in the formation of hormone-producing cells (Schwitzgebel et al., 2000). Notch signaling is the main negative regulator of *Ngn3* expression and function (Apelqvist et al., 1999; Jensen et al., 2000; Lee et al., 2001). High levels of Notch signaling induce *Hes1* activity that not only blocks the expression and activation of *Ngn3*, but also enhances its degradation (Qu et al., 2013). On the other hand, low levels of Notch signaling induce *Sox9* expression, which further activates *Ngn3* and drives endocrine differentiation (Shih et al., 2012). This highlights a dose-dependent function of Notch signaling in endocrine cell formation.

The increase in *Ngn3* levels (i.e. in *Ngn3*<sup>high</sup> cells) triggers endocrine commitment, cell cycle exit and delamination from the epithelium (Wang et al., 2010). However, not much is known about the cells expressing low levels of this protein (i.e. the *Ngn3*<sup>low</sup> cells). Recently, using a new transgenic reporter mouse model, a population of mitotic *Sox9*<sup>+</sup> cells that are transcriptionally active for *Ngn3* has been identified within the plexus state epithelium (Bechard et al., 2016). These endocrine-biased progenitors are different from pro-ductal progenitors, and they undergo symmetric cell divisions to either maintain the self-renewing progenitor pool or produce two differentiated endocrine cells (Fig. 3). Whether lineage commitment towards a specific endocrine cell type already occurs in these progenitors needs further exploration.

### Box 2. Cell plasticity during pancreas development and regeneration

The developing pancreas contains populations of multipotent progenitors that, during the course of normal development, can give rise to multiple pancreatic cell types. However, it is not yet clear if this potential exists in the adult pancreas. For example, whether the mature pancreatic duct is still able to produce endocrine cells in adults remains controversial. Such plasticity could be due to either the existence of a progenitor pool within the ductal epithelium or the ability of quiescent ductal cells to regain a progenitor state. However, under homeostatic conditions, no progenitor markers have yet been found in adult pancreatic ducts. In addition, several studies have obtained contradictory results regarding the formation of endocrine cells from mature ductal epithelium in different models of injury (Bonner-Weir et al., 1993, 2004; Inada et al., 2008; Kopinke and Murtaugh, 2010; Kopinke et al., 2011; Kopp et al., 2011a,b; Li et al., 2010; Solar et al., 2009; Xu et al., 2008). This discrepancy might be due to the different lineage-tracing approaches used to label rare progenitor cells within the ductal epithelium. In adult mice, forced conversion of  $\alpha$ -cells to  $\beta$ -cells induces glucagon deficiency, which provokes  $\alpha$ -cell neogenesis from the ductal epithelium via an Ngn3-expressing state (Al-Hasani et al., 2013; Collombat et al., 2009). The formation of  $\beta$ -like cells from terminally differentiated acinar cells upon transient cytokine treatment in diabetic mice has also been reported (Baeyens et al., 2013). Moreover, several studies have succeeded in differentiating adult ductal cells towards endocrine cells *in vitro* (Bonfanti et al., 2015; Bonner-Weir et al., 2000; Rovira et al., 2010; Valdez et al., 2016), although the characterization of these cells was mainly based on immunostaining analysis, which might generate false-positive results and would need further testing. While these findings support the generation of endocrine cells from the mature ductal epithelium, the extent to which this event contributes to islet regeneration is not well understood. Furthermore, whether ductal-derived islet neogenesis contributes to  $\beta$ -cell regeneration in humans needs further investigation.

Plasticity between endocrine fates has also been observed. Notably,  $\alpha$ -cells can successfully be converted to  $\beta$ -cells in adult mice *in vivo* by changing the Pax4-Arx transcriptional network (Courtney et al., 2013). More recently,  $\gamma$ -aminobutyric acid (GABA) and GABA<sub>A</sub> receptor signaling have been discovered to promote the transdifferentiation of  $\alpha$ -cells to  $\beta$ -cells in adult mice through downregulation and inactivation of *Arx*, respectively (Ben-Othman et al., 2017; Li et al., 2017). Moreover, the conversion of  $\alpha$ -cells to  $\beta$ -cells due to loss of *ARX* and DNA methyltransferase 1 (*DNMT1*) has been reported in human type 1 diabetes islets (Chakravarthy et al., 2017). These findings suggest that forced  $\alpha$ -cell to  $\beta$ -cell transdifferentiation might be an effective approach to regenerate  $\beta$ -cells in type 1 diabetes patients, where  $\alpha$ -cells are still present.

How the epithelium assures the correct balance between self-renewing endocrine progenitors and differentiated cells is also not understood, although a recent study has shed some light on this issue (Kim et al., 2015). In this study, which used *in vivo* clonal analysis and 3D time-lapse imaging of pancreatic explants, three types of pancreatic bipotent progenitor cell divisions were identified: symmetric self-renewing divisions that produce two pancreatic progenitors; symmetric divisions that produce two endocrine cells; and asymmetric divisions that produce one pancreatic progenitor and one endocrine cell (Kim et al., 2015). It was proposed that the timing of Ngn3 induction during the cell cycle defines progenitor differentiation in a stochastic process. In this model, if the induction happens at a late stage of the cell cycle, cells proceed with the division and form two endocrine progenitors. However, when induced at an early stage, cells exit the cell cycle and produce progenitors. Therefore, the production of one progenitor and one endocrine cell in this context results from the stochastic induction of differentiation in one of these daughter cells

after cell division. This finding might exclude the existence of classical asymmetric cell division, resulting from the unequal distribution of cell fate determinants during cell division, in pancreatic progenitors. The contribution of Ngn3<sup>low</sup> cells to the epithelial-endocrine balance in this model, however, remains ambiguous. Furthermore, while cells in the Ngn3<sup>high</sup> state are unipotent, it is not clear when they become specified towards distinct endocrine subtypes, although the timing of Ngn3 induction might play a role in this process. For example, it has been shown that Ngn3 induction at early stages of pancreas development generates mainly  $\alpha$ -cells, whereas induction at E11.5 or E14.5 favors the formation of  $\beta$ /PP-cells or  $\delta$ -cells, respectively (Johansson et al., 2007). This finding, however, does not exclude the possible involvement of extrinsic signals in priming specific endocrine subtypes, and requires further investigation.

### Signaling pathways regulating endocrine cell differentiation

Once cells are committed to become endocrine progenitors, they differentiate into specific endocrine cell types. These differentiation steps involve the expression of different pro-endocrine and endocrine-specific TFs that are directly regulated by Ngn3, as well as extrinsic signaling cues such as those derived from the surrounding mesenchyme (Table 2). FGF10, for instance, triggers Notch signaling to negatively regulate endocrine cell differentiation (Hart et al., 2003). Interestingly, mesenchyme-derived FGF10 triggers the expansion of Pdx1<sup>+</sup> progenitor cells, which was found to increase final  $\beta$ -cell number in a 7-day *ex vivo* differentiation protocol (Attali et al., 2007). The canonical Wnt pathway also affects endocrine cell development: deletion of  $\beta$ -catenin in pancreatic progenitors reduces  $\beta$ -cell number, and this is due to a decrease in early MPC expansion rather than defects in  $\beta$ -cell differentiation (Baumgartner et al., 2014). More recently, it was shown that mesenchyme-derived Wnt signaling has a regulatory function in endocrine differentiation (Larsen et al., 2015). Specifically, the deletion of *Hox6* genes (*Hoxa6*, *Hoxb6* and *Hoxc6*) in the mesenchyme was shown to reduce *Wnt5a* expression, ultimately preventing further differentiation of Ngn3<sup>+</sup> cells into endocrine cells. *Wnt5a* is known to activate the planar cell polarity (PCP) pathway, which has been shown to regulate endocrine cell differentiation. Indeed, mice null for the core PCP surface receptors *Celsr2* and *Celsr3* exhibit a reduction in differentiated endocrine cells, despite normal Ngn3<sup>+</sup> progenitor induction, and this effect is mediated through the c-Jun N-terminal kinase (JNK, or MAPK8) pathway (Cortijo et al., 2012). Recently, the Wnt/PCP pathway has also been shown to be important for pancreatic  $\beta$ -cell maturation in mouse and human (Bader et al., 2016), although how Wnt/PCP controls endocrine cell formation and maturation still needs to be explored further. Another recently described pathway regulating endocrine lineage specification is sphingosine-1-phosphate (S1p) signaling. The activity of S1p through the G protein-coupled receptor (GPCR) S1pr2 stabilizes and attenuates yes-associated protein (YAP) and Notch signaling, respectively, which promote progenitor survival and endocrine cell specification (Serafimidis et al., 2017). Because YAP is negatively regulated by Hippo signaling during pancreas development (Gao et al., 2013; George et al., 2012), the crosstalk between the S1p and Hippo pathways during endocrine cell differentiation requires further clarification.

### Gene regulatory networks underlying endocrine cell differentiation and maturation

Upon receiving autocrine and paracrine signals, endocrine progenitors proceed to differentiate via the stepwise activation of



complex gene regulatory networks (reviewed by Arda et al., 2013; Jensen, 2004) (Table 1). During this time, several TFs that are initially co-expressed in  $\text{Ngn3}^+$  cells progressively become restricted to specific endocrine cell types. The most prominent example of this is seen during the differentiation of  $\alpha$ -cells versus  $\beta$ -cells. Two TFs – *Arx* and *Pax4* – play a reciprocal counter-inhibitory role in this process. Both genes are targets of *Ngn3* and are initially expressed in  $\text{Ngn3}^+$  progenitors in a balanced fashion (Collombat et al., 2003). However, as differentiation proceeds, the expression balance between *Arx* and *Pax4* tips towards one side. If cells express higher levels of *Arx* they become committed to the  $\alpha$ -cell fate, whereas if progenitors express higher levels of *Pax4* then they differentiate into  $\beta/\delta$ -cells (Collombat et al., 2005; Sosa-Pineda et al., 1997). Interestingly, *Arx* and *Pax4* suppress the expression of each other (Collombat et al., 2003). As both genes are activated by *Ngn3*, an unknown signal or factor might coordinate the dominant expression of one over the other, although the nature of such an intrinsic or extrinsic determinant remains to be uncovered.

In addition to *Arx*, the differentiation of  $\alpha$ -cells relies on other TFs such as *Pax6*, *Rfx6*, *Brn4* (*Pou3f4*), *Foxa2* and *MafB* (reviewed by Bramswig and Kaestner, 2011). On the other hand, *Pdx1* and *Nkx6.1* are essential for  $\beta$ -cell formation. During development, the expression of *Pdx1* becomes progressively restricted to  $\beta$ -cells and to a subset of  $\delta$ -cells. One of the direct targets of *Pdx1* is the insulin gene, indicating the crucial role of this TF not only in cell fate determination, but also in  $\beta$ -cell function (Ahlgren et al., 1998; Hani et al., 1999). The expression of *Nkx6.1* also becomes gradually limited to insulin<sup>+</sup> cells during development, and elimination of this factor leads to a significant reduction in  $\beta$ -cell mass (Nelson et al., 2007; Sander et al., 2000; Schisler et al., 2008; Tessem et al., 2014). Remarkably, the expression levels of both *Pdx1* and *Nkx6.1* increase as  $\beta$ -cells differentiate, suggesting a dose-dependent function for these TFs on their  $\beta$ -cell-specific targets. Another important TF involved in endocrine cell differentiation is *Nkx2.2*, which plays an essential role in the differentiation of  $\alpha$ -,  $\beta$ - and PP-cells (Churchill et al., 2017; Sussel et al., 1998). In  $\text{Ngn3}^+$  progenitors, *Nkx2.2* represses and activates *NeuroD* to generate  $\alpha$ -cells and  $\beta$ -cells, respectively (Mastracci et al., 2013). This contradictory function of *Nkx2.2* in promoting or suppressing *NeuroD* expression might be due to cooperative function with other TFs and co-factors in  $\alpha$ -cells and  $\beta$ -cells. In differentiated endocrine cells, *Nkx2.2* is only expressed in  $\beta$ -cells, where it suppresses *Arx* expression and blocks the  $\alpha$ -cell program by contributing to a repressor complex, thereby maintaining  $\beta$ -cell identity (Papizan et al., 2011).

Compared with  $\alpha$ -cells and  $\beta$ -cells, less is known about the determination of other endocrine cell types. In the case of  $\delta$ -cells, *Pax4* might play a role: after induction of a  $\beta/\delta$ -cell program, cells further differentiate into either  $\beta$ -cells or  $\delta$ -cells, and the expression or loss of *Pax4* in these cells defines  $\beta$ -cell or  $\delta$ -cell fate, respectively (reviewed by Napolitano et al., 2015). It is not clear whether the absence of *Pax4* triggers default  $\delta$ -cell differentiation or if another, as yet unidentified factor drives the formation of these cells. Another player involved in  $\delta$ -cell development is hematopoietically expressed homeobox (*Hhex*), which has been identified as a specific regulator of  $\delta$ -cell differentiation (Zhang et al., 2014). The mechanisms underlying the differentiation of PP-cells and  $\epsilon$ -cells are largely unknown. Moreover, how the spatiotemporal regulation of these coordinated gene networks defines the final endocrine cell composition within the islets, and how much this depends on ventral or dorsal pancreatic fate, requires further investigation.

After differentiation, endocrine cells undergo maturation to acquire their glucose-responsive hormone-producing phenotype.

Two main TFs essential for  $\alpha/\beta$ -cell maturation are *MafA* and *MafB*. After differentiation,  $\alpha/\beta$ -cells express *MafB*, which progressively becomes limited to  $\alpha$ -cells, promoting their maturation and identity (Artner et al., 2007; Conrad et al., 2016). In  $\beta$ -cells, a switch from *MafB* to *MafA* is crucial for maturation (Nishimura et al., 2006). *MafA* is under the regulation of  $\beta$ -cell-specific TFs, such as *NeuroD*, *Nkx6.1*, *Nkx2.2*, *Foxa2*, *Rfx6*, *Pax6* and *Glis3* (reviewed by Arda et al., 2013), and together with *Pdx1*, *Nkx6.1* and *NeuroD* regulates the transcription of insulin (Gao et al., 2014; Taylor et al., 2013; Zhang et al., 2005). In addition, *Pdx1* and *Nkx2.2* play an important role in  $\beta$ -cell maturation by inducing mature  $\beta$ -cell markers such as glucokinase (*Gck*) and *Glut2* (*Slc2a2*) (Bastidas-Ponce et al., 2017; Doyle and Sussel, 2007; Hani et al., 1999).

### Generation of the islets of Langerhans

Starting from the secondary transition, differentiated endocrine cells leave the ductal epithelium, migrate into the surrounding mesenchyme and coalesce to form proto-islets (Figs 3 and 4). The interconnections of these structures with endothelial, mesenchymal and neuronal cells promote the formation of functional islets of Langerhans. This overall process, as we highlight below, is regulated by the spatiotemporal activities of a number of different signaling factors and the coordination of cell dynamics.

### Endocrine cell delamination

The first step of islet formation involves the delamination of differentiated endocrine cells from the trunk epithelium (Fig. 4A,B). Although these cells are known to undergo single-cell delamination (reviewed by Pan and Wright, 2011; Pictet and Rutter, 1972), our knowledge regarding the molecular mechanisms underlying the delamination process is rudimentary. It has been proposed that the onset of *Ngn3* expression triggers the machinery required for delamination. Indeed, upon increasing their *Ngn3* levels, endocrine progenitors acquire a bottle-shaped morphology, suggesting that *Ngn3* is involved in repolarization and outwards epithelial migration into the surrounding mesenchyme (Gouzi et al., 2011). The cellular mechanisms that govern delamination in this context also remain unclear, with two possible mechanisms having been proposed: asymmetric cell division and epithelial-mesenchymal transition (EMT). In several other epithelial systems, the unequal distribution of fate determinants results in asymmetric cell division, producing two different daughter cells (reviewed by NuemueLLer and Knoblich, 2009), and due to the orientation of the mitotic spindle in this type of division one of the cells is excluded from the epithelial plane (reviewed by Morin and Bellaïche, 2011). It is possible that a similar process occurs during endocrine cell delamination. However, there is no evidence to support the existence of classical asymmetric cell division or changes in mitotic spindle during pancreatic endocrine cell formation and delamination.

The other possible scenario for endocrine cell delamination is EMT (Cole et al., 2009). During this process, cells lose their epithelial characteristics and acquire a mesenchymal phenotype. These changes are accomplished by loss of cell polarity, remodeling of adhesion molecules and alterations in the cytoskeleton. Several findings suggest that this mechanism might play a role in the pancreas. For example, the Snail superfamily of TFs is known to play an important role in EMT, activating mesenchymal genes while blocking an epithelial program (Lee et al., 2011). It has been shown that, shortly after endocrine progenitors become committed, *Ngn3* triggers *Snail2* (*Snai2* or *Slug*) expression, resulting in a switch from E-cadherin to N-cadherin and expression of the intermediate filament vimentin, both of which are signs of EMT (Gouzi et al., 2011; Rukstalis and

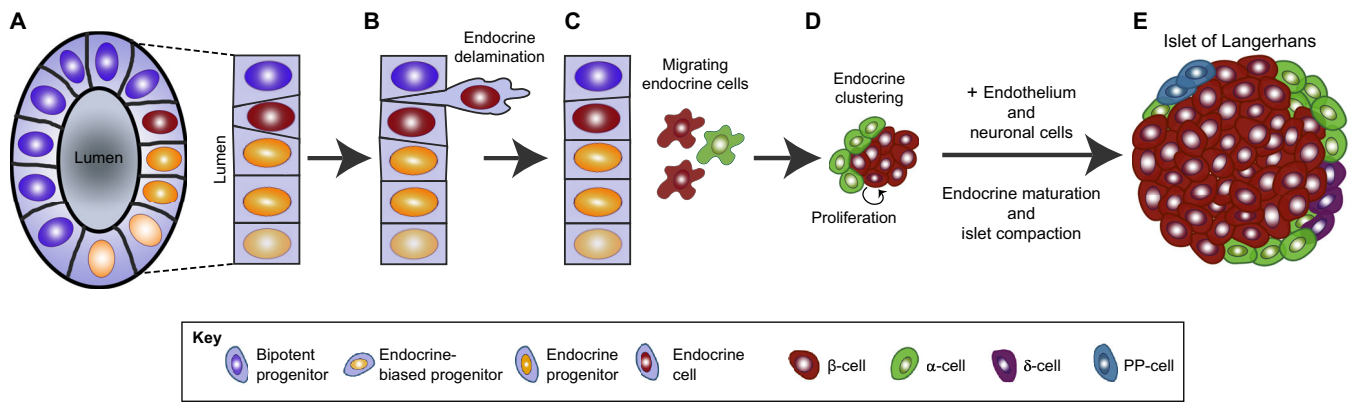

**Fig. 4. Endocrine cell delamination, migration and clustering.** (A,B) After differentiation within the epithelium, endocrine cells leave the epithelial plane by a delamination process that remains poorly characterized. (C) After detachment from the epithelium, endocrine cells migrate into the surrounding mesenchyme. (D) Within the mesenchyme, endocrine cells cluster and aggregate to form proto-islets. (E) The interconnection of these structures with endothelial and neuronal cells generates the functionally mature islets of Langerhans.

Habener, 2007). The downregulation of E-cadherin during endocrine delamination is partially mediated by the co-repressor Groucho-related gene 3 (*Grg3*, or *Tle3*), which is expressed in *Ngn3*<sup>+</sup> cells (Metzger et al., 2014). Of note, endocrine cells retain low levels of E-cadherin expression, suggesting the possible involvement of partial EMT during their delamination (reviewed by Morris and Machesky, 2015). Rearrangement of the actin cytoskeleton also plays a crucial role during EMT, and it was recently shown that the sustained activity of *Cdc42* stabilizes filamentous actin and cell-cell junctions, impairing endocrine delamination in the pancreas (Kesavan et al., 2014). Extrinsic factors such as *TGFβ* and canonical Wnt signaling, which are known to regulate EMT in carcinoma cells (reviewed by Zhang et al., 2016), are also present in the developing pancreas (Afelik et al., 2015; Tulachan et al., 2007), but it is unclear if they coordinate the EMT process in endocrine cells. Finally, the expression of *EphB3* in delaminating endocrine cells has been described (Villasenor et al., 2012), but whether this protein plays a role in the process needs to be clarified.

#### Endocrine cell migration

After delamination, endocrine cells migrate within the mesenchyme to form proto-islets (Fig. 4C). In order to migrate, cells need to coordinate their cellular machinery in response to external stimuli. One of the events during migration is the remodeling of adhesion molecules. An example is the switch from E-cadherin to N-cadherin during cell movement (Scarpa et al., 2015). The small GTPase *Rac1* is known to regulate E-cadherin-mediated cell adhesion and to subsequently coordinate cell migration, and it has been shown that *Rac1*-mediated endocrine cell migration is partially regulated by betacellulin (Greiner et al., 2009). *EpCAM* is another adhesion molecule that is upregulated in migrating endocrine cells, but is downregulated upon clustering and formation of the islets (Cirulli et al., 1998). Roles for integrins in endocrine cell motility have also been reported. For example, the expression of  $\alpha\beta5$  and  $\alpha\beta3$  integrins in human pancreatic epithelial cells and their binding to collagen IV, fibronectin and vitronectin is important for cell migration (Cirulli et al., 2000). Interestingly, the transplantation of human fetal explants into mice in the presence of the integrin-blocking RGD peptide results in failed endocrine cell migration and islet formation (Cirulli et al., 2000). Moreover,  $\alpha6\beta4$  and  $\alpha3\beta1$  integrins are expressed in pancreatic epithelial cells and regulate endocrine motility upon interaction with netrin 1, a laminin-1-like protein that directs neuronal axon guidance (Yebra et al., 2003).

The identity and source of the guidance cues orchestrating endocrine cell motility are also poorly characterized. It is possible that such signals are derived from the endothelium and/or the nervous system. Indeed, crosstalk between endothelial and neuronal cells is known to coordinate neurovascular patterning during development. This crosstalk is mediated by guidance cues such as semaphorins and VEGFs and their respective receptors, namely plexins/neuropilins and VEGFRs (reviewed by Andreone et al., 2015). Therefore, it would be interesting to investigate whether these factors also mediate endocrine cell migration during islet morphogenesis.

#### Endocrine cell clustering and islet assembly

The final step of islet formation involves aggregation of endocrine cells to create proto-islets (Fig. 4D). How endocrine cells find each other during this clustering process is unclear. It is possible that the assembled endocrine cells send guidance signals to the newly delaminating cells. However, the existence and identity of such signals remains obscure. By contrast, the clustering of, and communication between, endocrine cells is known to be mediated by heterotypic and homotypic interactions between adhesion molecules, such as cadherins, integrins, connexin 36 (*Gjd2*) gap junction, cell adhesion molecules (CAMs) and Eph-ephrins (reviewed by Jain and Lammert, 2009). In particular, cadherins have been shown to be important for  $\beta$ -cell aggregation during development (Dahl et al., 1996), although they are downregulated during the delamination process. CAMs are important in endocrine communication and islet formation. The deletion of *Ncam1* impairs endocrine aggregation due to the requirement of this molecule for  $\alpha$ -cell and PP-cell adhesion (Cirulli et al., 1994; Esni et al., 1999). Interestingly, isolated single pancreatic endocrine cells spontaneously reaggregate to form pseudo-islets (Halban et al., 1987), highlighting the intrinsic properties of adhesion molecules mediating endocrine cell clustering and the self-organizing nature of endocrine cells.

Mature islets are also in close contact with endothelial cells and neurons, both of which can influence islet architecture and function. Endothelial cells, for instance, provide the basement membrane for developing islets that is important for expansion, survival and activity of endocrine cells (Nikolova et al., 2006). In addition, endothelium-derived collagen IV and laminin-1 regulate endocrine development and function through integrin  $\beta1$  signaling (Diaferia et al., 2013). In turn, by producing VEGFA and angiopoietin, endocrine cells coordinate the formation of endothelial networks

within the islets (Brissova et al., 2014). Accordingly, the deletion or overexpression of *Vegfa* in *Pdx1*<sup>+</sup> cells results in an absence or increase in islet capillaries, respectively, suggesting tight regulation of endothelial density by endocrine cells to ensure appropriate glucose sensing and insulin release. Furthermore, pancreatic islets are innervated by sensory, parasympathetic and sympathetic neurons (reviewed by Rodriguez-Diaz and Caicedo, 2014; Thorens, 2014). This interconnection between neuronal projections and endocrine cells is initiated at E15.5, although the innervation of islets continues postnatally. Interestingly, by providing a vascular scaffold, endocrine-derived VEGF regulates islet innervation (Reinert et al., 2014), highlighting the coordination of islet neurovascular patterning by endocrine cells.

As islets develop and mature, they adopt a spherical shape in which  $\beta$ -cells, which constitute ~60-80% of mature islets (Steiner et al., 2010), are located at the core and are surrounded by a mantle of  $\alpha$ -cells and  $\delta$ -cells (Fig. 4E). This abundance of pancreatic  $\beta$ -cells in mature islets results from the proliferation of pre-existing  $\beta$ -cells. After birth,  $\beta$ -cells undergo maturation to achieve their final hormone-producing glucose-responsive phenotype. This process occurs postnatally and is defined by the expression of the gene urocortin 3 (Blum et al., 2012). Several TFs have been shown to regulate  $\beta$ -cell maturation, including MafA, Nkx2.2, *Pdx1* and *Foxa2* (Bastidas-Ponce et al., 2017; Doyle and Susse, 2007; Gao et al., 2014; Nishimura et al., 2006). Furthermore, the 3D organization of islets also impacts endocrine cell maturation and function. Specifically, interconnections between endocrine and non-endocrine cells within the islet microenvironment are thought to produce a 3D compacted structure that supports physiological function and allows the pancreas to respond to blood glucose levels (Bader et al., 2016; reviewed by Roscioni et al., 2016). How islets acquire this final architecture and full maturation status remains unclear, however, and is a topic of intense research.

### Conclusions

Over recent decades, our understanding of the mechanisms underlying rodent pancreas development – from early organ induction to formation of the exocrine and endocrine pancreas – has vastly increased. In particular, a number of signaling pathways and gene regulatory networks that are responsible for the formation of this organ have been identified. It has also been noted, perhaps not surprisingly, that mutations in genes encoding key pancreatic regulators can lead to pathological abnormalities in humans (Box 3). Much less is known about the cellular and molecular processes driving pancreas morphogenesis and organogenesis. For instance, knowledge about the cell polarization, microlumen formation and plexus remodeling events that occur during early pancreas development is rudimentary. Furthermore, the mechanisms that control the spatiotemporal regulation of epithelial remodeling, endocrine cell delamination and migration as well as islet assembly remain elusive. Answering such questions might identify novel molecular targets for the treatment and prevention of pathological conditions such as pancreatitis, pancreatic cancer and diabetes. In addition, although our understanding of the mechanisms driving human pancreas development is growing (Jennings et al., 2013; reviewed by Jennings et al., 2015), more efforts are required to dissect these mechanisms and relate them to those already identified from mouse studies.

Moving forward, these advances and approaches are likely to have important implications for generating improved treatments, notably cell-based therapies, for diabetes. Indeed, current efforts to devise cell-replacement therapies for type 1 diabetes have focused on the *in vitro* generation of  $\beta$ -like cells from pluripotent stem cells (Pagliuca

### Box 3. Human genetic mutations associated with abnormal pancreas development

Mutations in genes involved in pancreas development can cause various pathological abnormalities in humans. For example, the complete lack of pancreas (pancreatic agenesis) is observed in patients carrying homozygous mutations in genes involved in early pancreas development. In addition, monogenic diabetes, which represents 5% of diabetes cases and is divided into permanent neonatal diabetes mellitus (PNDM; present in newborns and infants) and maturity onset diabetes of the young (MODY; occurring predominantly in children and young adults), is due to inherited or spontaneous mutations in genes essential for pancreas and  $\beta$ -cell development.

Key pancreatic genes that, when mutated, are implicated in human pancreatic disorders:

- *PTF1A*: pancreatic agenesis, isolated pancreatic agenesis and PNDM (Sellick et al., 2004; Weedon et al., 2013)
- *GATA4/6*: PNDM, pancreatic agenesis, hypoplasia disorders and adult-onset diabetes (De Franco et al., 2013a; Lango Allen et al., 2012; Shaw-Smith et al., 2014)
- *PDX1*: MODY4, pancreatic agenesis and PNDM (De Franco et al., 2013b; Stoffers et al., 1997)
- *HNF1b*: MODY5, pancreatic hypoplasia and agenesis (Haumaitre et al., 2006)

Other genes involved in the development of PNDM include:

- *GLIS3* (Rubio-Cabezas et al., 2011; Senée et al., 2006), *RFX6* (Smith et al., 2010), *NEUROD1* (Rubio-Cabezas et al., 2010), *NKX2.2*, *MXN1* (Flanagan et al., 2014) and *PAX6* (Solomon et al., 2009)

et al., 2014; Rezanian et al., 2014; Russ et al., 2015), and obtaining a comprehensive picture of the developmental programs of endocrine cell formation will no doubt aid in the generation of functional glucose-responsive and hormone-producing cells. Understanding the principles of islet formation during development will also help to induce islet neogenesis in diabetic patients and to generate islet biomimetics for cell-replacement therapy. The recent establishment of 3D pancreatic organoid cultures (Greggio et al., 2013), CRISPR-Cas9 technology (reviewed by Sander and Joung, 2014) and single-cell-based analyses of the human pancreas (Wang et al., 2016a,b; Xin et al., 2016) have expanded the tool-box that can be employed to answer key questions regarding pancreatic cell formation, organization and function. In the future, these – together with continued studies of pancreas formation in rodents – will hopefully provide us with a comprehensive picture of the mechanisms that govern pancreas development and disease.

### Acknowledgements

We apologize to those colleagues whose work has not been cited owing to space limitations. We thank Donna Marie Thomson and Adriana Migliorini for comments on the manuscript.

### Competing interests

The authors declare no competing or financial interests.

### Funding

We thank the Helmholtz Association (Helmholtz-Gemeinschaft), German Research Foundation (Deutsche Forschungsgemeinschaft), and German Center for Diabetes Research (Deutsches Zentrum für Diabetes Forschung, DZD e.V.) for financial support.

### References

- Afelik, S. and Jensen, J. (2013). Notch signaling in the pancreas: patterning and cell fate specification. *Wiley Interdiscip. Rev. Dev. Biol.* **2**, 531-544.
- Afelik, S., Qu, X., Hasrouni, E., Bukys, M. A., Deering, T., Nieuwoudt, S., Rogers, W., Macdonald, R. J. and Jensen, J. (2012). Notch-mediated patterning and cell fate allocation of pancreatic progenitor cells. *Development* **139**, 1744-1753.

- Afelik, S., Pool, B., Schmerr, M., Penton, C. and Jensen, J. (2015). Wnt7b is required for epithelial progenitor growth and operates during epithelial-to-mesenchymal signaling in pancreatic development. *Dev. Biol.* **399**, 204-217.
- Ahlgren, U., Jonsson, J. and Edlund, H. (1996). The morphogenesis of the pancreatic mesenchyme is uncoupled from that of the pancreatic epithelium in IPF1/PDX1-deficient mice. *Development* **122**, 1409-1416.
- Ahlgren, U., Jonsson, J., Jonsson, L., Simu, K. and Edlund, H. (1998).  $\beta$ -Cell-specific inactivation of the mouse Ipf1/Pdx1 gene results in loss of the  $\beta$ -cell phenotype and maturity onset diabetes. *Genes Dev.* **12**, 1763-1768.
- Ahnfelt-Ronne, J., Jorgensen, M. C., Klinck, R., Jensen, J. N., Fuchtbauer, E.-M., Deering, T., MacDonald, R. J., Wright, C. V. E., Madsen, O. D. and Serup, P. (2012). Ptf1a-mediated control of Dll1 reveals an alternative to the lateral inhibition mechanism. *Development* **139**, 4492-4492.
- Al-Hasani, K., Pfeifer, A., Courtney, M., Ben-Othman, N., Gjernes, E., Vieira, A., Druelle, N., Avolio, F., Ravassard, P., Leuckx, G. et al. (2013). Adult duct-lining cells can reprogram into  $\beta$ -like cells able to counter repeated cycles of toxin-induced diabetes. *Dev. Cell* **26**, 86-100.
- Andreone, B. J., Lacoste, B. and Gu, C. (2015). Neuronal and vascular interactions. *Neurosci. Res.* **38**, 25-46.
- Apelqvist, A., Li, H., Sommer, L., Beatus, P., Anderson, D. J., Honjo, T., Hrabe de Angelis, M., Lendahl, U. and Edlund, H. (1999). Notch signalling controls pancreatic cell differentiation. *Nature* **400**, 877-881.
- Arda, H. E., Benitez, C. M. and Kim, S. K. (2013). Gene regulatory networks governing pancreas development. *Dev. Cell* **25**, 5-13.
- Artner, I., Bianchi, B., Raum, J. C., Guo, M., Kaneko, T., Cordes, S., Sieweke, M. and Stein, R. (2007). MafB is required for islet beta cell maturation. *Proc. Natl. Acad. Sci. USA* **104**, 3853-3858.
- Attali, M., Stetsyuk, V., Basmaciogullari, A., Aiello, V., Zanta-boussif, M. A., Duvillie, B. and Scharfmann, R. (2007). Control of  $\beta$ -cell differentiation by the pancreatic mesenchyme. *Diabetes* **56**, 1248-1258.
- Bader, E., Migliorini, A., Gegg, M., Moruzzi, N., Gerdes, J., Roscioni, S. S., Bakhti, M., Brandl, E., Irmirer, M., Beckers, J. et al. (2016). Identification of proliferative and mature  $\beta$ -cells in the islet of Langerhans. *Nature* **535**, 430-434.
- Baeyens, L., Lemper, M., Leuckx, G., De Groef, S., Bonfanti, P., Stangé, G., Shemer, R., Nord, C., Scheel, D. W., Pan, F. C. et al. (2013). Transient cytokine treatment induces acinar cell reprogramming and regenerates functional beta cell mass in diabetic mice. *Nat. Biotechnol.* **32**, 76-83.
- Bankaitis, E. D., Bechard, M. E. and Wright, C. V. E. (2015). Feedback control of growth, differentiation, and morphogenesis of pancreatic endocrine progenitors in an epithelial plexus niche. *Genes Dev.* **29**, 2203-2216.
- Bastidas-Ponce, A., Roscioni, S. S., Burtscher, I., Bader, E., Sterr, M., Bakhti, M. and Lickert, H. (2017). Foxa2 and Pdx1 cooperatively regulate postnatal maturation of pancreatic  $\beta$ -cells. *Mol. Metab.* **6**, 524-534.
- Baumgartner, B. K., Cash, G., Hansen, H., Ostler, S. and Murtaugh, L. C. (2014). Distinct requirements for beta-catenin in pancreatic epithelial growth and patterning. *Dev. Biol.* **391**, 89-98.
- Bechard, M. E., Bankaitis, E. D., Hipkens, S. B., Ustione, A., Piston, D. W., Yang, Y.-P., Magnuson, M. A. and Wright, C. V. E. (2016). Precommitment low-level Neurog3 expression defines a long-lived mitotic endocrine-biased progenitor pool that drives production of endocrine-committed cells. *Genes Dev.* **30**, 1852-1865.
- Beer, R. L., Parsons, M. J. and Rovira, M. (2016). Centroacinar cells: at the center of pancreas regeneration. *Dev. Biol.* **413**, 8-15.
- Ben-Othman, N., Vieira, A., Courtney, M., Record, F., Gjernes, E., Avolio, F., Hadzic, B., Druelle, N., Napolitano, T., Navarro-Sanz, S. et al. (2017). Long-term GABA administration induces alpha cell-mediated beta-like cell neogenesis. *Cell* **168**, 73-85.e11.
- Beres, T. M., Masui, T., Swift, G. H., Shi, L., Henke, R. M. and Macdonald, R. J. (2006). PTF1 is an organ-specific and notch-independent basic helix-loop-helix complex containing the mammalian suppressor of hairless (RBP-J) or its paralogue, RBP-L. *Mol. Cell Biol.* **26**, 117-130.
- Bhushan, A., Itoh, N., Kato, S., Thiery, J. P., Czernichow, P., Bellusci, S. and Scharfmann, R. (2001). Fgf10 is essential for maintaining the proliferative capacity of epithelial progenitor cells during early pancreatic organogenesis. *Development* **128**, 5109-5117.
- Blum, B., Hrvatin, S., Schuetz, C., Bonal, C., Rezanja, A. and Melton, D. A. (2012). Functional beta-cell maturation is marked by an increased glucose threshold and by expression of urocortin 3. *Nat. Biotechnol.* **30**, 261-264.
- Bonfanti, P., Nobecourt, E., Oshima, M., Albagli-Curiel, O., Laurysens, V., Stangé, G., Sojoodi, M., Heremans, Y., Heimberg, H. and Scharfmann, R. (2015). Ex vivo expansion and differentiation of human and mouse fetal pancreatic progenitors are modulated by epidermal growth factor. *Stem Cells Dev.* **24**, 1766-1778.
- Bonner-Weir, S., Baxter, L. A., Schuppin, G. T. and Smith, F. E. (1993). A second pathway for regeneration of adult exocrine and endocrine pancreas: a possible recapitulation of embryonic development. *Diabetes* **42**, 1715-1720.
- Bonner-Weir, S., Taneja, M., Weir, G. C., Tatkiewicz, K., Song, K.-H., Sharma, A. and O'Neil, J. J. (2000). In vitro cultivation of human islets from expanded ductal tissue. *Proc. Natl. Acad. Sci. USA* **97**, 7999-8004.
- Bonner-Weir, S., Toschi, E., Inada, A., Reitz, P., Fonseca, S. Y., Aye, T. and Sharma, A. (2004). The pancreatic ductal epithelium serves as a potential pool of progenitor cells. *Pediatr. Diabetes* **5** Suppl. 2, 16-22.
- Bramswig, N. C. and Kaestner, K. H. (2011). Transcriptional regulation of  $\alpha$ -cell differentiation. *Diabetes Obes. Metab.* **13**, 13-20.
- Brissova, M., Fowler, M. J., Nicholson, W. E., Chu, A., Hirshberg, B., Harlan, D. M. and Powers, A. C. (2005). Assessment of human pancreatic islet architecture and composition by laser scanning confocal microscopy. *J. Histochem. Cytochem.* **53**, 1087-1097.
- Brissova, M., Aamodt, K., Brahmachary, P., Prasad, N., Hong, J.-Y., Dai, C., Mellati, M., Shostak, A., Poffenberger, G., Aramandla, R. et al. (2014). Islet microenvironment, modulated by vascular endothelial growth factor-A signaling, promotes  $\beta$  cell regeneration. *Cell Metab.* **19**, 498-511.
- Burlison, J. S., Long, Q., Fujitani, Y., Wright, C. V. E. and Magnuson, M. A. (2008). Pdx-1 and Ptf1a concurrently determine fate specification of pancreatic multipotent progenitor cells. *Dev. Biol.* **316**, 74-86.
- Cano, D. A., Soria, B., Martín, F. and Rojas, A. (2014). Transcriptional control of mammalian pancreas organogenesis. *Cell. Mol. Life Sci.* **71**, 2383-2402.
- Capito, C., Simon, M., Aiello, V., Clark, A., Aigrain, Y., Ravassard, P. and Scharfmann, R. (2013). Mouse muscle as an ectopic permissive site for human pancreatic development. *Diabetes* **62**, 3479-3487.
- Chakravarthy, H., Gu, X., Enge, M., Dai, X., Wang, Y., Diamond, N., Downie, C., Liu, K., Wang, J., Xing, Y. et al. (2017). Converting adult pancreatic islet  $\alpha$  cells into  $\beta$  cells by targeting both Dnmt1 and Arx. *Cell Metab.* **25**, 622-634.
- Chung, W.-S., Shin, C. H. and Stainier, D. Y. R. (2008). Bmp2 signaling regulates the hepatic versus pancreatic fate decision. *Dev. Cell* **15**, 738-748.
- Churchill, A. J., Gutiérrez, G. D., Singer, R. A., Lorberbaum, D. S., Fischer, K. A. and Sussel, L. (2017). Genetic evidence that Nkx2.2 acts primarily downstream of Neurog3 in pancreatic endocrine lineage development. *Elife* **6**, 1-18.
- Ciurli, V., Baetens, D., Rutishauser, U., Halban, P. A., Orci, L. and Rouiller, D. G. (1994). Expression of neural cell adhesion molecule (N-CAM) in rat islets and its role in islet cell type segregation. *J. Cell Sci.* **107**, 1429-1436.
- Ciurli, V., Crisa, L., Beattie, G. M., Mally, M. I., Lopez, A. D., Fannon, A., Ptasznik, A., Inverardi, L., Ricordi, C., Deerinck, T. et al. (1998). KSA antigen Ep-CAM mediates cell-cell adhesion of pancreatic epithelial cells: Morphoregulatory roles in pancreatic islet development. *J. Cell Biol.* **140**, 1519-1534.
- Ciurli, V., Beattie, G. M., Klier, G., Ellisman, M., Ricordi, C., Quaranta, V., Frasier, F., Ishii, J. K., Hayek, A. and Salomon, D. R. (2000). Expression and function of alpha(v)beta(3) and alpha(v)beta(5) integrins in the developing pancreas: roles in the adhesion and migration of putative endocrine progenitor cells. *J. Cell Biol.* **150**, 1445-1460.
- Cleaver, O. and Dor, Y. (2012). Vascular instruction of pancreas development. *Development* **139**, 2833-2843.
- Cleveland, M. H., Sawyer, J. M., Afelik, S., Jensen, J. and Leach, S. D. (2012). Exocrine ontogenies: On the development of pancreatic acinar, ductal and centroacinar cells. *Semin. Cell Dev. Biol.* **23**, 711-719.
- Cole, L., Anderson, M., Antin, P. B. and Limesand, S. W. (2009). One process for pancreatic beta-cell coalescence into islets involves an epithelial-mesenchymal transition. *J. Endocrinol.* **203**, 19-31.
- Collombat, P., Mansouri, A., Hecksher-sørensen, J., Serup, P., Krull, J., Gradwohl, G. and Gruss, P. (2003). Opposing actions of Arx and Pax4 in endocrine pancreas development. *Genes Dev.* **17**, 2591-2603.
- Collombat, P., Hecksher-Sørensen, J., Broccoli, V., Krull, J., Ponte, I., Mundiger, T., Smith, J., Gruss, P., Serup, P. and Mansouri, A. (2005). The simultaneous loss of Arx and Pax4 genes promotes a somatostatin-producing cell fate specification at the expense of the  $\alpha$ - and  $\beta$ -cell lineages in the mouse endocrine pancreas. *Development* **132**, 2969-2980.
- Collombat, P., Xu, X., Ravassard, P., Sosa-Pineda, B., Dussaud, S., Billestrup, N., Madsen, O. D., Serup, P., Heimberg, H. and Mansouri, A. (2009). The ectopic expression of Pax4 in the mouse pancreas converts progenitor cells into  $\alpha$  and subsequently  $\beta$  cells. *Cell* **138**, 449-462.
- Conrad, E., Dai, C., Spaeth, J., Guo, M., Cyphert, H. A., Scoville, D., Carroll, J., Yu, W.-M., Goodrich, L. V., Harlan, D. M. et al. (2016). The MAFB transcription factor impacts islet  $\alpha$ -cell function in rodents and represents a unique signature of primate islet  $\beta$ -cells. *Am. J. Physiol. Endocrinol. Metab.* **310**, E91-E102.
- Cortijo, C., Gouzi, M., Tissir, F. and Grapin-Botton, A. (2012). Planar cell polarity controls pancreatic Beta cell differentiation and glucose homeostasis. *Cell Rep.* **2**, 1593-1606.
- Courtney, M., Gjernes, E., Druelle, N., Ravaud, C., Vieira, A., Ben-Othman, N., Pfeifer, A., Avolio, F., Leuckx, G., Lacas-Gervais, S. et al. (2013). The inactivation of Arx in pancreatic  $\alpha$ -cells triggers their neogenesis and conversion into functional  $\beta$ -like cells. *PLoS Genet.* **9**, 1-18.
- Crisera, C. A., Kadison, A. S., Breslow, G. D., Maldonado, T. S., Longaker, M. T. and Gittes, G. K. (2000). Expression and role of laminin-1 in mouse pancreatic organogenesis. *Diabetes* **49**, 936-944.
- Dahl, U., Sjødin, A. and Semb, H. (1996). Cadherins regulate aggregation of pancreatic beta-cells in vivo. *Development* **122**, 2895-2902.
- Dassaye, R., Naidoo, S. and Cerf, M. E. (2016). Transcription factor regulation of pancreatic organogenesis, differentiation and maturation. *Islets* **8**, 13-34.

- De Franco, E., Shaw-Smith, C., Flanagan, S. E., Shepherd, M. H., Hattersley, A. T. and Ellard, S. (2013a). GATA6 mutations cause a broad phenotypic spectrum of diabetes from pancreatic agenesis to adult-onset diabetes without exocrine insufficiency. *Diabetes* **62**, 993-997.
- De Franco, E., Shaw-Smith, C., Flanagan, S. E., Edghill, E. L., Wolf, J., Otte, V., Ebinger, F., Varthakavi, P., Vasanthi, T., Edvardsson, S. et al. (2013b). Biallelic PDX1 (insulin promoter factor 1) mutations causing neonatal diabetes without exocrine pancreatic insufficiency. *Diabet. Med.* **30**, e197-e200.
- De Vas, M. G., Kopp, J. L., Heliot, C., Sander, M., Cereghini, S. and Haumaitre, C. (2015). Hnf1b controls pancreas morphogenesis and the generation of Ngn3+ endocrine progenitors. *Development* **142**, 871-882.
- Delaspire, F., Beer, R. L., Rovira, M., Huang, W., Wang, G., Gee, S., Del Carmen Vityre, M., Wheelan, S. J. and Parsons, M. J. (2015). Centroacinar cells are progenitors that contribute to endocrine pancreas regeneration. *Diabetes* **64**, 3499-3509.
- Deutsch, G., Jung, J., Zheng, M., Lórá, J. and Zaret, K. S. (2001). A bipotential precursor population for pancreas and liver within the embryonic endoderm. *Development* **128**, 871-881.
- Diaferia, G. R., Jimenez-Caliani, A. J., Ranjitkar, P., Yang, W., Hardiman, G., Rhodes, C. J., Crisa, L. and Cirulli, V. (2013).  $\beta 1$  integrin is a crucial regulator of pancreatic  $\beta$ -cell expansion. *Development* **140**, 3360-3372.
- Direnzo, D., Hess, D. A., Damsz, B., Hallett, J. E., Marshall, B., Goswami, C., Liu, Y., Deering, T., MacDonald, R. J. and Konieczny, S. F. (2012). Induced Mist1 expression promotes remodeling of mouse pancreatic acinar cells. *Gastroenterology* **143**, 469-480.
- Doyle, M. J. and Sussell, L. (2007). Nkx2.2 regulates  $\beta$ -cell function in the mature islet. *Diabetes* **56**, 1999-2007.
- Dunne, R. F. and Hezel, A. F. (2015). Genetics and biology of pancreatic ductal adenocarcinoma. *Hematol. Oncol. Clin. North Am.* **29**, 595-608.
- Duvill  , B., Attali, M., Bounacer, A., Ravassard, P., Basmaciogullari, A. and Scharfmann, R. (2006). The mesenchyme controls the timing of pancreatic  $\beta$ -cell differentiation. *Diabetes* **55**, 582-589.
- Esni, F. (2004). Notch inhibits Ptf1 function and acinar cell differentiation in developing mouse and zebrafish pancreas. *Development* **131**, 4213-4224.
- Esni, F., T  ljedal, I.-B., Perl, A.-K., Cremer, H., Christofori, G. and Semb, H. (1999). Neural cell adhesion molecule (N-CAM) is required for cell type segregation and normal ultrastructure in pancreatic islets. *J. Cell Biol.* **144**, 325-337.
- Flanagan, S. E., De Franco, E., Allen, H. L., Zerah, M., Abdul-rasoul, M. M., Edge, J. A., Stewart, H., Alamiri, E., Hussain, K., Wallis, S. et al. (2014). Analysis of transcription factors key for mouse pancreatic development establishes NKX2-2 and MNX1 mutations as causes of neonatal diabetes in man. *Cell Metab.* **19**, 146-154.
- Fujikura, J., Hosoda, K., Iwakura, H., Tomita, T., Noguchi, M., Masuzaki, H., Tanigaki, K., Yabe, D., Honjo, T. and Nakao, K. (2006). Notch/Rbp-j signaling prevents premature endocrine and ductal cell differentiation in the pancreas. *Cell Metab.* **3**, 59-65.
- Gao, N., LeLay, J., Vatamaniuk, M. Z., Rieck, S., Friedman, J. R. and Kaestner, K. H. (2008). Dynamic regulation of Pdx1 enhancers by Foxa1 and Foxa2 is essential for pancreas development. *Genes Dev.* **22**, 3435-3448.
- Gao, T., Zhou, D., Yang, C., Singh, T., Penzo-M  ndez, A., Maddipati, R., Tzatsos, A., Bardeesy, N., Avruch, J. and Stanger, B. Z. (2013). Hippo signaling regulates differentiation and maintenance in the exocrine pancreas. *Gastroenterology* **144**, 1543-1553.e1.
- Gao, T., McKenna, B., Li, C., Reichert, M., Nguyen, J., Singh, T., Yang, C., Pannikar, A., Doliba, N., Zhang, T. et al. (2014). Pdx1 maintains beta cell identity and function by repressing an  $\alpha$  cell program. *Cell Metab.* **19**, 259-271.
- George, N. M., Day, C. E., Boerner, B. P., Johnson, R. L. and Sarvetnick, N. E. (2012). Hippo signaling regulates pancreas development through inactivation of Yap. *Mol. Cell Biol.* **32**, 5116-5128.
- Georgia, S., Soliz, R., Li, M., Zhang, P. and Bhushan, A. (2006). p57 and Hes1 coordinate cell cycle exit with self-renewal of pancreatic progenitors. *Dev. Biol.* **298**, 22-31.
- Gittes, G. K. (2009). Developmental biology of the pancreas: a comprehensive review. *Dev. Biol.* **326**, 4-35.
- Gittes, G. K., Galante, P. E., Hanahan, D., Rutter, W. J. and Debase, H. T. (1996). Lineage-specific morphogenesis in the developing pancreas: role of mesenchymal factors. *Development* **122**, 439-447.
- Golosow, N. and Grobstein, C. (1962). Epitheliomesenchymal interaction in pancreatic morphogenesis. *Dev. Biol.* **4**, 242-255.
- Gouzi, M., Kim, Y. H., Katsumoto, K., Johansson, K. and Grapin-Botton, A. (2011). Neurogenin3 initiates stepwise delamination of differentiating endocrine cells during pancreas development. *Dev. Dyn.* **240**, 589-604.
- Gradwohl, G., Dierich, A., LeMour, M. and Guillemot, F. (2000). Neurogenin3 is required for the development of the four endocrine cell lineages of the pancreas. *Proc. Natl. Acad. Sci. USA* **97**, 1607-1611.
- Greggio, C., De Franceschi, F., Figueiredo-Larsen, M., Gobaa, S., Ranga, A., Semb, H., Lutolf, M. and Grapin-Botton, A. (2013). Artificial three-dimensional niches deconstruct pancreas development in vitro. *Development* **140**, 4452-4462.
- Greiner, T. U., Kesavan, G., St  hlberg, A. and Semb, H. (2009). Rac1 regulates pancreatic islet morphogenesis. *BMC Dev. Biol.* **9**, 2.
- Gu, G., Dubauskaite, J. and Melton, D. A. (2002). Direct evidence for the pancreatic lineage: NGN3+ cells are islet progenitors and are distinct from duct progenitors. *Development* **129**, 2447-2457.
- Guz, Y., Montminy, M. R., Stein, R., Leonard, J., Gamer, L. W., Wright, C. V. and Teitelman, G. (1995). Expression of murine STF-1, a putative insulin gene transcription factor, in beta cells of pancreas, duodenal epithelium and pancreatic exocrine and endocrine progenitors during ontogeny. *Development* **121**, 11-18.
- Halban, P. A., Powers, S. L., George, K. L. and Bonner-Weir, S. (1987). Spontaneous reassociation of dispersed adult rat pancreatic islet cells into aggregates with three-dimensional architecture typical of native islets. *Diabetes* **36**, 783-790.
- Hald, J., Hjorth, J. P., German, M. S., Madsen, O. D., Serup, P. and Jensen, J. (2003). Activated Notch1 prevents differentiation of pancreatic acinar cells and attenuate endocrine development. *Dev. Biol.* **260**, 426-437.
- Hale, M. A., Kagami, H., Shi, L., Holland, A. M., Els  sser, H.-P., Hammer, R. E. and MacDonald, R. J. (2005). The homeodomain protein PDX1 is required at mid-pancreatic development for the formation of the exocrine pancreas. *Dev. Biol.* **286**, 225-237.
- Hale, M. A., Swift, G. H., Hoang, C. Q., Deering, T. G., Masui, T., Lee, Y.-K., Xue, J. and MacDonald, R. J. (2014). The nuclear hormone receptor family member NR5A2 controls aspects of multipotent progenitor cell formation and acinar differentiation during pancreatic organogenesis. *Development* **141**, 3123-3133.
- Hani, E. H., Stoffers, D. A., Ch  vre, J.-C., Durand, E., Stanojevic, V., Dina, C., Habener, J. F. and Froguel, P. (1999). Defective mutations in the insulin promoter factor-1 (IPF-1) gene in late-onset type 2 diabetes mellitus. *J. Clin. Invest.* **104**, R41-R48.
- Hanley, K. P., Hearn, T., Berry, A., Carvell, M. J., Patch, A.-M., Williams, L. J., Sugden, S. A., Wilson, D. I., Ellard, S. and Hanley, N. A. (2010). In vitro expression of NGN3 identifies RAB3B as the predominant Ras-associated GTP-binding protein 3 family member in human islets. *J. Endocrinol.* **207**, 151-161.
- Hart, A., Papadopoulou, S. and Edlund, H. (2003). Fgf10 maintains notch activation, stimulates proliferation, and blocks differentiation of pancreatic epithelial cells. *Dev. Dyn.* **228**, 185-193.
- Harunaga, J., Hsu, J. C. and Yamada, K. M. (2011). Dynamics of salivary gland morphogenesis. *J. Dent. Res.* **90**, 1070-1077.
- Haumaitre, C., Barbacci, E., Jenny, M., Ott, M. O., Gradwohl, G. and Cereghini, S. (2005). Lack of TCF2/vHNF1 in mice leads to pancreas agenesis. *Proc. Natl. Acad. Sci. USA* **102**, 1490-1495.
- Haumaitre, C., Fabre, M., Cormier, S., Baumann, C., Delezoide, A. L. and Cereghini, S. (2006). Severe pancreas hypoplasia and multicystic renal dysplasia in two human fetuses carrying novel HNF1 $\beta$ /MODY5 mutations. *Hum. Mol. Genet.* **15**, 2363-2375.
- Hebrok, M., Kim, S. K. and Melton, D. A. (1998). Notochord repression of endodermal sonic hedgehog permits pancreas development. *Genes Dev.* **12**, 1705-1713.
- Heid, I., Lubeseder-Martellato, C., Sipos, B., Mazur, P. K., Lesina, M., Schmid, R. M. and Siveke, J. T. (2011). Early requirement of rac1 in a mouse model of pancreatic cancer. *Gastroenterology* **141**, 719-730.e7.
- Hendley, A. M., Provost, E., Bailey, J. M., Wang, Y. J., Cleveland, M. H., Blake, D., Bittman, R. W., Roeser, J. C., Maitra, A., Reynolds, A. B. et al. (2015). p120 Catenin is required for normal tubulogenesis but not epithelial integrity in developing mouse pancreas. *Dev. Biol.* **399**, 41-53.
- Hisaoka, M., Haratake, J. and Hashimoto, H. (1993). Pancreatic morphogenesis and extracellular matrix organization during rat development. *Differentiation* **53**, 163-172.
- Horn, S., Kobberup, S., J  rgensen, M. C., Kalisz, M., Klein, T., Kageyama, R., Gegg, M., Lickert, H., Lindner, J., Magnuson, M. A. et al. (2012). Mind bomb 1 is required for pancreatic  $\beta$ -cell formation. *Proc. Natl. Acad. Sci. USA* **109**, 7356-7361.
- Inada, A., Nienaber, C., Katsuta, H., Fujitani, Y., Levine, J., Morita, R., Sharma, A. and Bonner-Weir, S. (2008). Carbonic anhydrase II-positive pancreatic cells are progenitors for both endocrine and exocrine pancreas after birth. *Proc. Natl. Acad. Sci. USA* **105**, 19915-19919.
- Jain, R. and Lammert, E. (2009). Cell-cell interactions in the endocrine pancreas. *Diabetes Obes. Metab.* **11** Suppl. 4, 159-167.
- Jennings, R. E., Berry, A. A., Kirkwood-Wilson, R., Roberts, N. A., Hearn, T., Salisbury, R. J., Blaylock, J., Piper Hanley, K. and Hanley, N. A. (2013). Development of the human pancreas from foregut to endocrine commitment. *Diabetes* **62**, 3514-3522.
- Jennings, R. E., Berry, A. A., Strutt, J. P., Gerrard, D. T. and Hanley, N. A. (2015). Human pancreas development. *Development* **142**, 3126-3137.
- Jensen, J. (2004). Gene regulatory factors in pancreatic development. *Dev. Dyn.* **229**, 176-200.
- Jensen, J., Pedersen, E. E., Galante, P., Hald, J., Heller, R. S., Ishibashi, M., Kageyama, R., Guillemot, F., Serup, P. and Madsen, O. D. (2000). Control of endodermal endocrine development by Hes-1. *Nat. Genet.* **24**, 36-44.

- Jeon, J., Correa-Medina, M., Ricordi, C., Edlund, H. and Diez, J. A. (2009). Endocrine cell clustering during human pancreas development. *J. Histochem. Cytochem.* **57**, 811-824.
- Jia, D., Sun, Y. and Konieczny, S. F. (2008). Mist1 regulates pancreatic acinar cell proliferation through p21CIP1/WAF1. *Gastroenterology* **135**, 1687-1697.
- Johansson, K. A., Dursun, U., Jordan, N., Gu, G., Beermann, F., Gradwohl, G. and Grapin-Botton, A. (2007). Temporal control of neurogenin3 activity in pancreas progenitors reveals competence windows for the generation of different endocrine cell types. *Dev. Cell* **12**, 457-465.
- Jonsson, J., Carlsson, L., Edlund, T. and Edlund, H. (1994). Insulin-promoter-factor 1 is required for pancreas development in mice. *Nature* **371**, 606-609.
- Kawaguchi, Y., Cooper, B., Gannon, M., Ray, M., MacDonald, R. J. and Wright, C. V. E. (2002). The role of the transcriptional regulator Ptf1a in converting intestinal to pancreatic progenitors. *Nat. Genet.* **32**, 128-134.
- Kesavan, G., Sand, F. W., Greiner, T. U., Johansson, J. K., Kobberup, S., Wu, X., Brakebusch, C. and Semb, H. (2009). Cdc42-mediated tubulogenesis controls cell specification. *Cell* **139**, 791-801.
- Kesavan, G., Lieven, O., Mamidi, A., Öhlin, Z. L., Johansson, J. K., Li, W.-C., Lommel, S., Greiner, T. U. and Semb, H. (2014). Cdc42/N-WASP signaling links actin dynamics to pancreatic  $\beta$  cell delamination and differentiation. *Development* **141**, 685-696.
- Kim, S. K., Hebrok, M., Li, E., Oh, S. P., Schrewe, H., Harmon, E. B., Lee, J. S. and Melton, D. A. (2000). Activin receptor patterning of foregut organogenesis. *Genes Dev.* **14**, 1866-1871.
- Kim, Y. H., Larsen, H. L., Rué, P., Lemaire, L. A., Ferrer, J. and Grapin-Botton, A. (2015). Cell cycle-dependent differentiation dynamics balances growth and endocrine differentiation in the pancreas. *PLoS Biol.* **13**, e1002111.
- Kopinke, D. and Murtaugh, L. C. (2010). Exocrine-to-endocrine differentiation is detectable only prior to birth in the uninjured mouse pancreas. *BMC Dev. Biol.* **10**, 38.
- Kopinke, D., Brailsford, M., Shea, J. E., Leavitt, R., Scaife, C. L. and Murtaugh, L. C. (2011). Lineage tracing reveals the dynamic contribution of Hes1+ cells to the developing and adult pancreas. *Development* **138**, 431-441.
- Kopinke, D., Brailsford, M., Pan, F. C., Magnuson, M. A., Wright, C. V. E. and Murtaugh, L. C. (2012). Ongoing Notch signaling maintains phenotypic fidelity in the adult exocrine pancreas. *Dev. Biol.* **362**, 57-64.
- Kopp, J. L., Dubois, C. L., Schaffer, A. E., Hao, E., Shih, H. P., Seymour, P. A., Ma, J. and Sander, M. (2011a). Sox9+ ductal cells are multipotent progenitors throughout development but do not produce new endocrine cells in the normal or injured adult pancreas. *Development* **138**, 653-665.
- Kopp, J. L., Dubois, C. L., Hao, E., Thorel, F., Herrera, P. L. and Sander, M. (2011b). Progenitor cell domains in the developing and adult pancreas. *Cell Cycle* **10**, 1921-1927.
- Krapp, A., Knöfler, M., Ledermann, B., Bürki, K., Berney, C., Zoerkler, N., Hagenbüchle, O. and Wellauer, P. K. (1998). The bHLH protein PTF1-p48 is essential for the formation of the exocrine and the correct spatial organization of the endocrine pancreas. *Genes Dev.* **12**, 3752-3763.
- Kumar, M. and Melton, D. (2003). Pancreas specification: a budding question. *Curr. Opin. Genet. Dev.* **13**, 401-407.
- Kumar, M., Jordan, N., Melton, D. and Grapin-Botton, A. (2003). Signals from lateral plate mesoderm instruct endoderm toward a pancreatic fate. *Dev. Biol.* **259**, 109-122.
- Lammert, E., Cleaver, O. and Melton, D. (2001). Induction of pancreatic differentiation by signals from blood vessels. *Science* **294**, 564-567.
- Lammert, E., Cleaver, O. and Melton, D. (2003). Role of endothelial cells in early pancreas and liver development. *Mech. Dev.* **120**, 59-64.
- Lango Allen, H., Flanagan, S. E., Shaw-Smith, C., De Franco, E., Akerman, I., Caswell, R., the International Pancreatic Agenesis Consortium, Ferrer, J., Hattersley, A. T. and Ellard, S. (2012). GATA6 haploinsufficiency causes pancreatic agenesis in humans. *Nat. Genet.* **44**, 20-22.
- Larsen, H. L. and Grapin-Botton, A. (2017). The molecular and morphogenetic basis of pancreas organogenesis. *Semin. Cell Dev. Biol.* **66**, 51-68.
- Larsen, B. M., Hrycaj, S. M., Newman, M., Li, Y. and Wellik, D. M. (2015). Mesenchymal Hox6 function is required for mouse pancreatic endocrine cell differentiation. *Development* **142**, 3859-3868.
- Lee, J. C., Smith, S. B., Watada, H., Lin, J., Scheel, D., Wang, J., Mirmira, R. G. and German, M. S. (2001). Regulation of the pancreatic pro-endocrine gene neurogenin3. *Diabetes* **50**, 928-936.
- Lee, K. A., Gjorevski, N., Boghaert, E., Radisky, D. C. and Nelson, C. M. (2011). Snail1, Snail2, and E47 promote mammary epithelial branching morphogenesis. *EMBO J.* **30**, 2662-2674.
- Li, W.-C., Rukstalis, J. M., Nishimura, W., Tchipashvili, V., Habener, J. F., Sharma, A. and Bonner-Weir, S. (2010). Activation of pancreatic-duct-derived progenitor cells during pancreas regeneration in adult rats. *J. Cell Sci.* **123**, 2792-2802.
- Li, J., Casteels, T., Frogne, T., Ingvorsen, C., Honoré, C., Courtney, M., Huber, K. V. M., Schmitner, N., Kimmel, R. A., Romanov, R. A. et al. (2017). Artemisinins target GABAA receptor signaling and impair  $\alpha$  cell identity. *Cell* **168**, 1-15.
- Ling, Q., Xu, X., Zheng, S.-S. and Kalthoff, H. (2013). The diversity between pancreatic head and body/tail cancers: clinical parameters and in vitro models. *Hepatobiliary Pancreat. Dis. Int.* **12**, 480-487.
- Lynn, F. C., Smith, S. B., Wilson, M. E., Yang, K. Y., Nekrep, N. and German, M. S. (2007). Sox9 coordinates a transcriptional network in pancreatic progenitor cells. *Proc. Natl. Acad. Sci. USA* **104**, 10500-10505.
- Lyttle, B. M., Li, J., Krishnamurthy, M., Fellows, F., Wheeler, M. B., Goodyer, C. G. and Wang, R. (2008). Transcription factor expression in the developing human fetal endocrine pancreas. *Diabetologia* **51**, 1169-1180.
- Magenheim, J., Klein, A. M., Stanger, B. Z., Ashery-Padan, R., Sosa-Pineda, B., Gu, G. and Dor, Y. (2011a). Ngn3+ endocrine progenitor cells control the fate and morphogenesis of pancreatic ductal epithelium. *Dev. Biol.* **359**, 26-36.
- Magenheim, J., Ilovich, O., Lazarus, A., Klochendler, A., Ziv, O., Werman, R., Hija, A., Cleaver, O., Mishani, E., Keshet, E. et al. (2011b). Blood vessels restrain pancreas branching, differentiation and growth. *Development* **138**, 4743-4752.
- Martín, M., Gallego-Llamas, J., Ribes, V., Keding, M., Niederreither, K., Chambon, P., Dollé, P. and Gradwohl, G. (2005). Dorsal pancreas agenesis in retinoic acid-deficient Raldh2 mutant mice. *Dev. Biol.* **284**, 399-411.
- Marty-Santos, L. and Cleaver, O. (2015). Progenitor epithelium: sorting out pancreatic lineages. *J. Histochem. Cytochem.* **63**, 559-574.
- Marty-Santos, L. and Cleaver, O. (2016). Pdx1 regulates pancreas tubulogenesis and E-cadherin expression. *Development* **143**, 101-112.
- Mastracci, T. L., Anderson, K. R., Papizan, J. B. and Sussel, L. (2013). Regulation of Neurod1 contributes to the lineage potential of Neurogenin3+ endocrine precursor cells in the pancreas. *PLoS Genet.* **9**, e1003278.
- Masui, T., Swift, G. H., Deering, T., Shen, C., Coats, W. S., Long, Q., Elsässer, H. P., Magnuson, M. A. and MacDonald, R. J. (2010). Replacement of Rbpj with Rbpjl in the PTF1 complex controls the final maturation of pancreatic acinar cells. *Gastroenterology* **139**, 270-280.
- McCracken, K. W. and Wells, J. M. (2012). Molecular pathways controlling pancreas induction. *Semin. Cell Dev. Biol.* **23**, 656-662.
- Meier, J. J., Köhler, C. U., Alkhatib, B., Sergi, C., Junker, T., Klein, H. H., Schmidt, W. E. and Fritsch, H. (2010). Beta-cell development and turnover during prenatal life in humans. *Eur. J. Endocrinol.* **162**, 559-568.
- Metzger, D. E., Liu, C., Ziaie, A. S., Najj, A. and Zaret, K. S. (2014). Grg3/TLE3 and Grg1/TLE1 induce monohormonal pancreatic  $\beta$ -cells while repressing  $\alpha$ -cell functions. *Diabetes* **63**, 1804-1816.
- Miralles, F., Czernichow, P. and Scharfmann, R. (1998). Follistatin regulates the relative proportions of endocrine versus exocrine tissue during pancreatic development. *Development* **125**, 1017-1024.
- Morin, X. and Bellaïche, Y. (2011). Mitotic spindle orientation in asymmetric and symmetric cell divisions during animal development. *Dev. Cell* **21**, 102-119.
- Morris, H. T. and Machesky, L. M. (2015). Actin cytoskeletal control during epithelial to mesenchymal transition: focus on the pancreas and intestinal tract. *Br. J. Cancer* **112**, 613-620.
- Murtaugh, L. C. and Keefe, M. D. (2015). Regeneration and repair of the exocrine pancreas. *Annu. Rev. Physiol.* **77**, 229-249.
- Murtaugh, L. C. and Melton, D. A. (2003). Genes, signals, and lineages in pancreas development. *Annu. Rev. Cell Dev. Biol.* **19**, 71-89.
- Murtaugh, L. C., Stanger, B. Z., Kwan, K. M. and Melton, D. A. (2003). Notch signaling controls multiple steps of pancreatic differentiation. *Proc. Natl. Acad. Sci. USA* **100**, 14920-14925.
- Murtaugh, L. C., Law, A. C., Dor, Y. and Melton, D. A. (2005). Beta-catenin is essential for pancreatic acinar but not islet development. *Development* **132**, 4663-4674.
- Napolitano, T., Avolio, F., Courtney, M., Vieira, A., Druelle, N., Ben-Othman, N., Hadzic, B., Navarro, S. and Collombat, P. (2015). Pax4 acts as a key player in pancreas development and plasticity. *Semin. Cell Dev. Biol.* **44**, 107-114.
- Nelson, S. B., Schaffer, A. E. and Sander, M. (2007). The transcription factors Nkx6.1 and Nkx6.2 possess equivalent activities in promoting beta-cell fate specification in Pdx1+ pancreatic progenitor cells. *Development* **134**, 2491-2500.
- Nikolova, G., Jabs, N., Konstantinova, I., Domogatskaya, A., Tryggvason, K., Sorokin, L., Fässler, R., Gu, G., Gerber, H.-P., Ferrara, N. et al. (2006). The vascular basement membrane: A niche for insulin gene expression and  $\beta$  cell proliferation. *Dev. Cell* **10**, 397-405.
- Nishimura, W., Kondo, T., Salameh, T., El Khattabi, I., Dodge, R., Bonner-Weir, S. and Sharma, A. (2006). A switch from MafB to MafA expression accompanies differentiation to pancreatic beta-cells. *Dev. Biol.* **293**, 526-539.
- Norgaard, G. A., Jensen, J. N. and Jensen, J. (2003). FGF10 signaling maintains the pancreatic progenitor cell state revealing a novel role of Notch in organ development. *Dev. Biol.* **264**, 323-338.
- Nuemueller, R. A. and Knoblich, J. A. (2009). Dividing cellular asymmetry: asymmetric cell division and its implications for stem cells and cancer. *Genes Dev.* **23**, 2675-2699.
- Offield, M. F., Jetton, T. L., Labosky, P. A., Ray, M., Stein, R. W., Magnuson, M. A., Hogan, B. L. M. and Wright, C. V. E. (1996). PDX-1 is required for pancreatic outgrowth and differentiation of the rostral duodenum. *Development* **95**, 983-995.

- Pagliuca, F. W., Millman, J. R., Gürtler, M., Segel, M., Van Dervort, A., Ryu, J. H., Peterson, Q. P., Greiner, D. and Melton, D. A. (2014). Generation of functional human pancreatic beta cells in vitro. *Cell* **159**, 428-439.
- Pan, F. C. and Brissova, M. (2014). Pancreas development in humans. *Curr. Opin. Endocrinol. Diabetes Obes.* **21**, 77-82.
- Pan, F. C. and Wright, C. (2011). Pancreas organogenesis: from bud to plexus to gland. *Dev. Dyn.* **240**, 530-565.
- Papizan, J. B., Singer, R. A., Tschen, S.-I., Dhawan, S., Friel, J. M., Hipkens, S. B., Magnuson, M. A., Bhushan, A. and Sussel, L. (2011). Nkx2.2 repressor complex regulates islet  $\beta$ -cell specification and prevents  $\beta$ -to- $\alpha$ -cell reprogramming. *Genes Dev.* **25**, 2291-2305.
- Petri, A., Ahnfelt-Rønne, J., Frederiksen, K. S., Edwards, D. G., Madsen, D., Serup, P., Fleckner, J. and Heller, R. S. (2006). The effect of neurogenin3 deficiency on pancreatic gene expression in embryonic mice. *J. Mol. Endocrinol.* **37**, 301-316.
- Petzold, K. M., Naumann, H., Spagnoli, F. M., Bain, J., Plater, L., Elliott, M., Shpiro, N., Hastie, C. J., McLauchlan, H., Klevernic, I. et al. (2013). Rho signalling restriction by the RhoGAP Stard13 integrates growth and morphogenesis in the pancreas. *Development* **140**, 126-135.
- Pictet, R. and Rutter, W. J. (1972). Development of the embryonic endocrine pancreas. In *Handbook of Physiology*, Vol. 1 (ed. D. F. Steiner and N. Freinkel), pp. 25-66. Baltimore: Williams and Wilkins.
- Pierreux, C. E., Poll, A. V., Kemp, C., Clotman, F., Maestro, M. A., Cordi, S., Ferrer, J., Leyns, L., Rousseau, G. G. and Lemaigre, F. P. (2006). The transcription factor hepatocyte nuclear factor-6 controls the development of pancreatic ducts in the mouse. *Gastroenterology* **130**, 532-541.
- Pierreux, C. E., Cordi, S., Hick, A.-C., Achouri, Y., Ruiz de Almodovar, C., Prévot, P.-P., Courtoy, P. J., Carmeliet, P. and Lemaigre, F. P. (2010). Epithelial: endothelial cross-talk regulates exocrine differentiation in developing pancreas. *Dev. Biol.* **347**, 216-227.
- Puri, S. and Hebrok, M. (2007). Dynamics of embryonic pancreas development using real-time imaging. *Dev. Biol.* **306**, 82-93.
- Qu, X., Afelik, S., Jensen, J. N., Bukys, M. A., Kobberup, S., Scharrer, M., Xiao, F., Nyeng, P., Veronica Albertoni, M., Grapin-Botton, A. et al. (2013). Notch-mediated post-translational control of Ngn3 protein stability regulates pancreatic patterning and cell fate commitment. *Dev. Biol.* **376**, 1-12.
- Reichert, M. and Rustgi, A. K. (2011). Pancreatic ductal cells in development, regeneration, and neoplasia. *J. Clin. Invest.* **121**, 4572-4578.
- Reinert, R. B., Cai, Q., Hong, J.-Y., Plank, J. L., Aamodt, K., Prasad, N., Aramandla, R., Dai, C., Levy, S. E., Pozzi, A. et al. (2014). Vascular endothelial growth factor coordinates islet innervation via vascular scaffolding. *Development* **141**, 1480-1491.
- Rezania, A., Bruin, J. E., Arora, P., Rubin, A., Batushansky, I., Asadi, A., O'Dwyer, S., Quiskamp, N., Mojibian, M., Albrecht, T. et al. (2014). Reversal of diabetes with insulin-producing cells derived in vitro from human pluripotent stem cells. *Nat. Biotechnol.* **32**, 1121-1133.
- Rieck, S., Bankaitis, E. D. and Wright, C. V. E. (2012). Lineage determinants in early endocrine development. *Semin. Cell Dev. Biol.* **23**, 673-684.
- Riedel, M. J., Asadi, A., Wang, R., Ao, Z., Warnock, G. L. and Kieffer, T. J. (2012). Immunohistochemical characterisation of cells co-producing insulin and glucagon in the developing human pancreas. *Diabetologia* **55**, 372-381.
- Rodriguez-Diaz, R. and Caicedo, A. (2014). Neural control of the endocrine pancreas. *Best Pract. Res. Clin. Endocrinol. Metab.* **28**, 745-756.
- Roscioni, S. S., Migliorini, A., Gegg, M. and Lickert, H. (2016). Impact of islet architecture on  $\beta$ -cell heterogeneity, plasticity and function. *Nat. Rev. Endocrinol.* **12**, 695-709.
- Rovira, M., Scott, S.-G., Liss, A. S., Jensen, J., Thayer, S. P. and Leach, S. D. (2010). Isolation and characterization of centroacinar/terminal ductal progenitor cells in adult mouse pancreas. *Proc. Natl. Acad. Sci. USA* **107**, 75-80.
- Rubio-Cabezas, O., Minton, J. A. L., Kantor, I., Williams, D., Ellard, S. and Hattersley, A. T. (2010). Homozygous mutations in NEUROD1 are responsible for a novel syndrome of permanent neonatal diabetes and neurological abnormalities. *Diabetes* **59**, 2326-2331.
- Rubio-Cabezas, O., Jensen, J. N., Hodgson, M. I., Codner, E., Ellard, S., Serup, P. and Hattersley, A. T. (2011). Permanent neonatal diabetes and enteric anodendrosis associated with biallelic mutations in NEUROG3. *Diabetes* **60**, 1349-1353.
- Rubio-Cabezas, O., Codner, E., Flanagan, S. E., Gómez, J. L., Ellard, S. and Hattersley, A. T. (2014). Neurogenin 3 is important but not essential for pancreatic islet development in humans. *Diabetologia* **57**, 2421-2424.
- Rukstalis, J. M. and Habener, J. F. (2007). Snail2, a mediator of epithelial-mesenchymal transitions, expressed in progenitor cells of the developing endocrine pancreas. *Gene Expr. Patterns* **7**, 471-479.
- Russ, H. A., Parent, A. V., Ringler, J. J., Hennings, T. G., Nair, G. G., Shveygert, M., Guo, T., Puri, S., Haatjala, L., Cirulli, V. et al. (2015). Controlled induction of human pancreatic progenitors produces functional beta-like cells in vitro. *EMBO J.* **34**, 1759-1772.
- Salisbury, R. J., Blaylock, J., Berry, A. A., Jennings, R. E., De Krijger, R., Hanley, K. P. and Hanley, N. A. (2014). The window period of NEUROGENIN3 during human gestation. *Islets* **6**, e954436.
- Sander, J. D. and Joung, J. K. (2014). CRISPR-Cas systems for editing, regulating and targeting genomes. *Nat. Biotechnol.* **32**, 347-355.
- Sander, M., Sussel, L., Conners, J., Scheel, D., Kalamaras, J., Dela Cruz, F., Schwitzgebel, V., Hayes-Jordan, A. and German, M. (2000). Homeobox gene Nkx6.1 lies downstream of Nkx2.2 in the major pathway of beta-cell formation in the pancreas. *Development* **127**, 5533-5540.
- Scarpa, E., Szabó, A., Bibonne, A., Theveneau, E., Parsons, M. and Mayor, R. (2015). Cadherin switch during EMT in neural crest cells leads to contact inhibition of locomotion via repolarization of forces. *Dev. Cell* **34**, 421-434.
- Schaffer, A. E., Freude, K. K., Nelson, S. B. and Sander, M. (2010). Nkx6 transcription factors and Ptf1a function as antagonistic lineage determinants in multipotent pancreatic progenitors. *Dev. Cell* **18**, 1022-1029.
- Schisler, J. C., Fueger, P. T., Babu, D. A., Hohmeier, H. E., Tessem, J. S., Lu, D., Becker, T. C., Naziruddin, B., Levy, M., Mirmira, R. G. et al. (2008). Stimulation of human and rat islet beta-cell proliferation with retention of function by the homeodomain transcription factor Nkx6.1. *Mol. Cell. Biol.* **28**, 3465-3476.
- Schwitzgebel, V. M., Scheel, D. W., Conners, J. R., Kalamaras, J., Lee, J. E., Anderson, D. J., Sussel, L., Johnson, J. D. and German, M. S. (2000). Expression of neurogenin3 reveals an islet cell precursor population in the pancreas. *Development* **127**, 3533-3542.
- Sellick, G. S., Barker, K. T., Stolte-Dijkstra, I., Fleischmann, C., Coleman, R. J., Garrett, C., Gloyn, A. L., Edghill, E. L., Hattersley, A. T., Wellauer, P. K. et al. (2004). Mutations in PTF1A cause pancreatic and cerebellar agenesis. *Nat. Genet.* **36**, 1301-1305.
- Senée, V., Chelala, C., Duchatelet, S., Feng, D., Blanc, H., Cossec, J.-C., Charon, C., Nicolino, M., Boileau, P., Cavener, D. R. et al. (2006). Mutations in GLIS3 are responsible for a rare syndrome with neonatal diabetes mellitus and congenital hypothyroidism. *Nat. Genet.* **38**, 682-687.
- Serafidis, I., Rodriguez-Aznar, E., Lesche, M., Yoshioka, K., Takuwa, Y., Dahl, A., Pan, D. and Gavalas, A. (2017). Pancreas lineage allocation and specification are regulated by sphingosine-1-phosphate signalling. *PLoS Biol.* **15**, e2000949.
- Serup, P. (2012). Signaling pathways regulating murine pancreatic development. *Semin. Cell Dev. Biol.* **23**, 663-672.
- Seymour, P. A. (2014). Sox9: A master regulator of the pancreatic program. *Rev. Diabet. Stud.* **11**, 51-83.
- Seymour, P. A., Shih, H. P., Patel, N. A., Freude, K. K., Xie, R., Lim, C. J. and Sander, M. (2012). A Sox9/Fgf feed-forward loop maintains pancreatic organ identity. *Development* **139**, 3363-3372.
- Shaw-Smith, C., De Franco, E., Allen, H. L., Battle, M., Flanagan, S. E., Borowiec, M., Taplin, C. E., Van Alfen-Van Der Velden, J., Cruz-Rojo, J., De Nancraes, G. P. et al. (2014). GATA4 mutations are a cause of neonatal and childhood-onset diabetes. *Diabetes* **63**, 2888-2894.
- Shi, Z.-D., Lee, K., Yang, D., Amin, S., Verma, N., Li, Q. V., Zhu, Z., Soh, C.-L., Kumar, R., Evans, T. et al. (2017). Genome editing in hPSCs reveals GATA6 haploinsufficiency and a genetic interaction with GATA4 in human pancreatic development. *Cell Stem Cell* **20**, 675-688.e6.
- Shih, H. P., Kopp, J. L., Sandhu, M., Dubois, C. L., Seymour, P. A., Grapin-Botton, A. and Sander, M. (2012). A Notch-dependent molecular circuitry initiates pancreatic endocrine and ductal cell differentiation. *Development* **139**, 2488-2499.
- Shih, H. P., Wang, A. and Sander, M. (2013). Pancreas organogenesis: from lineage determination to morphogenesis. *Annu. Rev. Cell Dev. Biol.* **29**, 81-105.
- Shih, H. P., Seymour, P. A., Patel, N. A., Xie, R., Wang, A., Liu, P. P., Yeo, G. W., Magnuson, M. A. and Sander, M. (2015a). A gene regulatory network cooperatively controlled by Pdx1 and Sox9 governs lineage allocation of foregut progenitor cells. *Cell Rep.* **13**, 326-336.
- Shih, H. P., Panlasigui, D., Cirulli, V. and Sander, M. (2015b). ECM signaling regulates collective cellular dynamics to control pancreas branching morphogenesis. *Cell Rep.* **14**, 169-179.
- Smith, S. B., Qu, H.-Q., Taleb, N., Kishimoto, N. Y., Scheel, D. W., Lu, Y., Patch, A.-M., Grabs, R., Wang, J., Lynn, F. C. et al. (2010). Rfx6 directs islet formation and insulin production in mice and humans. *Nature* **463**, 775-780.
- Solar, M., Cardalda, C., Houbracken, I., Martín, M., Maestro, M. A., De Medts, N., Xu, X., Grau, V., Heimberg, H., Bouwens, L. et al. (2009). Pancreatic exocrine duct cells give rise to insulin-producing beta cells during embryogenesis but not after birth. *Dev. Cell* **17**, 849-860.
- Solomon, B. D., Pineda-Alvarez, D. E., Balog, J. Z., Hadley, D., Gropman, A. L., Nandagopal, R., Han, J. C., Hahn, J. S., Blain, D., Brooks, B. et al. (2009). Compound heterozygosity for mutations in PAX6 in a patient with complex brain anomaly, neonatal diabetes mellitus, and microphthalmia. *Am. J. Med. Genet. A* **149A**, 2543-2546.
- Sosa-Pineda, B., Chowdhury, K., Torres, M., Oliver, G. and Gruss, P. (1997). The Pax4 gene is essential for differentiation of insulin-producing beta cells in the mammalian pancreas. *Nature* **386**, 399-402.
- Spence, J. R., Lange, A. W., Lin, S.-C. J., Kaestner, K. H., Lowy, A. M., Kim, I., Whitsett, J. A. and Wells, J. M. (2009). Sox17 regulates organ lineage segregation of ventral foregut progenitor cells. *Dev. Cell* **17**, 62-74.
- Standop, J., Ulrich, A. B., Schneider, M. B., Büchler, M. W. and Pour, P. M. (2002). Differences in the expression of xenobiotic-metabolizing enzymes

- between islets derived from the ventral and dorsal anlage of the pancreas. *Pancreatology* **2**, 510-518.
- Stanger, B. Z., Tanaka, A. J. and Melton, D. A.** (2007). Organ size is limited by the number of embryonic progenitor cells in the pancreas but not the liver. *Nature* **445**, 886-891.
- Stefan, Y., Grasso, S., Perelet, A. and Orci, L.** (1982). The pancreatic polypeptide-rich lobe of the human pancreas: definitive identification of its derivation from the ventral pancreatic primordium. *Diabetologia* **23**, 141-142.
- Steiner, D. J., Kim, A., Miller, K. and Hara, M.** (2010). Pancreatic islet plasticity: interspecies comparison of islet architecture and composition. *Islets* **2**, 135-145.
- Stoffers, D. A., Ferrer, J., Clarke, W. L. and Habener, J. F.** (1997). Early-onset type-II diabetes mellitus (MODY4) linked to IPF1. *Nat. Genet.* **17**, 138-139.
- Sussel, L., Kalamaras, J., Hartigan-O'Connor, D. J., Meneses, J. J., Pedersen, R. A., Rubenstein, J. L. and German, M. S.** (1998). Mice lacking the homeodomain transcription factor Nkx2.2 have diabetes due to arrested differentiation of pancreatic beta cells. *Development* **125**, 2213-2221.
- Taylor, B. L., Liu, F.-F. and Sander, M.** (2013). Nkx6.1 is essential for maintaining the functional state of pancreatic beta cells. *Cell Rep.* **4**, 1262-1275.
- Tessem, J. S., Moss, L. G., Chao, L. C., Arlotto, M., Lu, D., Jensen, M. V., Stephens, S. B., Tontonoz, P., Hohmeier, H. E. and Newgard, C. B.** (2014). Nkx6.1 regulates islet  $\beta$ -cell proliferation via Nr4a1 and Nr4a3 nuclear receptors. *Proc. Natl. Acad. Sci. USA* **111**, 5242-5247.
- Thorens, B.** (2014). Neural regulation of pancreatic islet cell mass and function. *Diabetes Obes. Metab.* **16**, 87-95.
- Tremblay, K. D. and Zaret, K. S.** (2005). Distinct populations of endoderm cells converge to generate the embryonic liver bud and ventral foregut tissues. *Dev. Biol.* **280**, 87-99.
- Tulachan, S. S., Tei, E., Hembree, M., Crisera, C., Prasadani, K., Koizumi, M., Shah, S., Guo, P., Bottinger, E. and Gittes, G. K.** (2007). TGF- $\beta$  isoform signaling regulates secondary transition and mesenchymal-induced endocrine development in the embryonic mouse pancreas. *Dev. Biol.* **305**, 508-521.
- Uchida, T., Takada, T., Ammori, B. J., Suda, K. and Takahashi, T.** (1999). Three-dimensional reconstruction of the ventral and dorsal pancreas: a new insight into anatomy and embryonic development. *J. Hepatobiliary Pancreat. Surg.* **6**, 176-180.
- Valdez, I. A., Dirice, E., Gupta, M. K., Shirakawa, J., Teo, A. K. K. and Kulkarni, R. N.** (2016). Proinflammatory cytokines induce endocrine differentiation in pancreatic ductal cells via STAT3-dependent NGN3 activation. *Cell Rep.* **15**, 460-470.
- Villasenor, A., Chong, D. C. and Cleaver, O.** (2008). Biphasic Ngn3 expression in the developing pancreas. *Dev. Dyn.* **237**, 3270-3279.
- Villasenor, A., Chong, D. C., Henkemeyer, M. and Cleaver, O.** (2010). Epithelial dynamics of pancreatic branching morphogenesis. *Development* **137**, 4295-4305.
- Villasenor, A., Marty-Santos, L., Dravis, C., Fletcher, P., Henkemeyer, M. and Cleaver, O.** (2012). EphB3 marks delaminating endocrine progenitor cells in the developing pancreas. *Dev. Dyn.* **241**, 1008-1019.
- Wang, S., Yan, J., Anderson, D. A., Xu, Y., Kanal, M. C., Cao, Z., Wright, C. V. E. and Gu, G.** (2010). Neurog3 gene dosage regulates allocation of endocrine and exocrine cell fates in the developing mouse pancreas. *Dev. Biol.* **339**, 26-37.
- Wang, X., Misawa, R., Zielinski, M. C., Cowen, P., Jo, J., Perival, V., Ricordi, C., Khan, A., Szust, J., Shen, J. et al.** (2013). Regional differences in islet distribution in the human pancreas - preferential beta-cell loss in the head region in patients with type 2 diabetes. *PLoS ONE* **8**, e67454.
- Wang, Y. J., Schug, J., Won, K.-J., Liu, C., Naji, A., Avrahami, D., Golson, M. L. and Kaestner, K. H.** (2016a). Single-cell transcriptomics of the human endocrine pancreas. *Diabetes* **65**, 3028-3038.
- Wang, Y. J., Golson, M. L., Schug, J., Traum, D., Liu, C., Vivek, K., Dorrell, C., Naji, A., Powers, A. C., Chang, K.-M. et al.** (2016b). Single-cell mass cytometry analysis of the human endocrine pancreas. *Cell Metab.* **24**, 616-626.
- Weedon, M. N., Cebola, I., Patch, A.-M., Flanagan, S. E., De Franco, E., Caswell, R., Rodríguez-segú, S. A., Shaw-smith, C., Cho, C. H.-H., Allen, H. L. et al.** (2013). Recessive mutations in a distal PTF1A enhancer cause isolated pancreatic agenesis. *Nat. Genet.* **46**, 61-64.
- Wells, J. M. and Melton, D. A.** (1999). Vertebrate endoderm development. *Annu. Rev. Cell Dev. Biol.* **15**, 393-410.
- Wells, J. M., Esmi, F., Boivin, G. P., Aronow, B. J., Stuart, W., Combs, C., Sklenka, A., Leach, S. D. and Lowy, A. M.** (2007). Wnt/ $\beta$ -catenin signaling is required for development of the exocrine pancreas. *BMC Dev. Biol.* **7**, 4.
- Wessells, N. K. and Cohen, J. H.** (1967). Early pancreas organogenesis: morphogenesis, tissue interactions, and mass effects. *Dev. Biol.* **15**, 237-270.
- Wittingen, J. and Frey, C. F.** (1974). Islet concentration in the head, body, tail and uncinuate process of the pancreas. *Ann. Surg.* **179**, 412-414.
- Xin, Y., Kim, J., Okamoto, H., Ni, M., Wei, Y., Adler, C., Murphy, A. J., Yancopoulos, G. D., Lin, C. and Gromada, J.** (2016). RNA sequencing of single human islet cells reveals type 2 diabetes genes. *Cell Metab.* **24**, 608-615.
- Xu, X., D'Hoker, J., Stangé, G., Bonné, S., De Leu, N., Xiao, X., Van De Castele, M., Mellitzer, G., Ling, Z., Pipeleers, D. et al.** (2008). Beta cells can be generated from endogenous progenitors in injured adult mouse pancreas. *Cell* **132**, 197-207.
- Xuan, S. and Sussel, L.** (2016). GATA4 and GATA6 regulate pancreatic endoderm identity through inhibition of hedgehog signaling. *Development* **143**, 780-786.
- Yebrá, M., Montgomery, A. M. P., Diaferia, G. R., Kaido, T., Silletti, S., Perez, B., Just, M. L., Hildbrand, S., Hurford, R., Florkiewicz, E. et al.** (2003). Recognition of the neural chemoattractant Netrin-1 by integrins  $\alpha 6 \beta 4$  and  $\alpha 3 \beta 1$  regulates epithelial cell adhesion and migration. *Dev. Cell* **5**, 695-707.
- Yoshitomi, H.** (2004). Endothelial cell interactions initiate dorsal pancreas development by selectively inducing the transcription factor Ptf1a. *Development* **131**, 807-817.
- Zhang, C., Moriguchi, T., Kajihara, M., Esaki, R., Harada, A., Shimohata, H., Oishi, H., Hamada, M., Morito, N., Hasegawa, K. et al.** (2005). MafA is a key regulator of glucose-stimulated insulin secretion. *Mol. Cell. Biol.* **25**, 4969-4976.
- Zhang, J., Mckenna, L. B., Bogue, C. W. and Kaestner, K. H.** (2014). The diabetes gene Hhex maintains  $\delta$ -cell differentiation and islet function. *Genes Dev.* **28**, 829-834.
- Zhang, J., Tian, X.-J. and Xing, J.** (2016). Signal transduction pathways of EMT induced by TGF- $\beta$ , SHH, and WNT and their crosstalks. *J. Clin. Med.* **5**, 41.
- Zhou, Q., Law, A. C., Rajagopal, J., Anderson, W. J., Gray, P. A. and Melton, D. A.** (2007). A multipotent progenitor domain guides pancreatic organogenesis. *Dev. Cell* **13**, 103-114.
- Zorn, A. M. and Wells, J. M.** (2009). Vertebrate endoderm development and organ formation. *Annu. Rev. Cell Dev. Biol.* **25**, 221-251.
